# Supplementary material for: Synthesis of 4-Hydroxyquinolines as Potential Cytotoxic Agents
Source: MDPI journal article supplement (doi:10.3390/ijms23179688), 2022-08-26
Supplement: s1 [file s1]

# Synthesis of 4-Hydroxyquinolines as Potential Cytotoxic Agents

Oszkár Csuvik <sup>1</sup>, Nikoletta Szemerédi <sup>2</sup>, Gabriella Spengler <sup>2</sup> and István Szatmári <sup>1,3,\*</sup>

<sup>1</sup> Institute of Pharmaceutical Chemistry, University of Szeged, Eötvös u. 6, H-6720 Szeged, Hungary

<sup>2</sup> Department of Medical Microbiology, Albert Szent-Györgyi Health Center and Albert Szent-Györgyi Medical School, University of Szeged, Semmelweis u. 6, H-6725 Szeged, Hungary

<sup>3</sup> Stereochemistry Research Group, Eötvös Loránd Research Network, University of Szeged, Eötvös u. 6, H-6720 Szeged, Hungary

\* Correspondence: szatmari.istvan@szte.hu

**Table S1. Physical-chemical properties of the synthesised 4-hydroxyquinolines.**

| Compound   | Melting point (°C) | Molecular weight [M + H <sup>+</sup> ] |
|------------|--------------------|----------------------------------------|
| <b>4a</b>  | 211–214            | 218.0808                               |
| <b>4b</b>  | 208–210            | 232.0964                               |
| <b>5</b>   | 294–297            | 279.1126                               |
| <b>7</b>   | >350               | 331.1441                               |
| <b>12</b>  | 199–202            | 407.1756                               |
| <b>8</b>   | 221–224            | 204.0659                               |
| <b>9</b>   | >350               | 269.1651                               |
| <b>10a</b> | 166–169            | 327.1702                               |
| <b>10b</b> | 152–155            | 341.1854                               |
| <b>13a</b> | 247–251            | 306.1119                               |
| <b>13b</b> | 222–225            | 320.1277                               |
| <b>20</b>  | 257–260            | 365.1129                               |
| <b>21</b>  | 233–236            | 338.1182                               |
| <b>22</b>  | 224–227            | 334.1434                               |
| <b>23</b>  | 215–218            | 350.1384                               |
| <b>24</b>  | 256–259            | 363.1700                               |
| <b>25</b>  | 262–265            | 370.1435                               |
| <b>26</b>  | 177–180            | 370.1434                               |
| <b>28</b>  | 315–319            | 290.0808                               |
| <b>29</b>  | 295–298            | 340.0966                               |
| <b>30</b>  | >350               | 340.0966                               |
| <b>14</b>  | 230–233            | 292.0968                               |

<sup>1</sup>H NMR, <sup>13</sup>C NMR, and HRMS spectra of synthesised compounds

Methyl 2-(4-hydroxyquinolin-2-yl) acetate (4a)

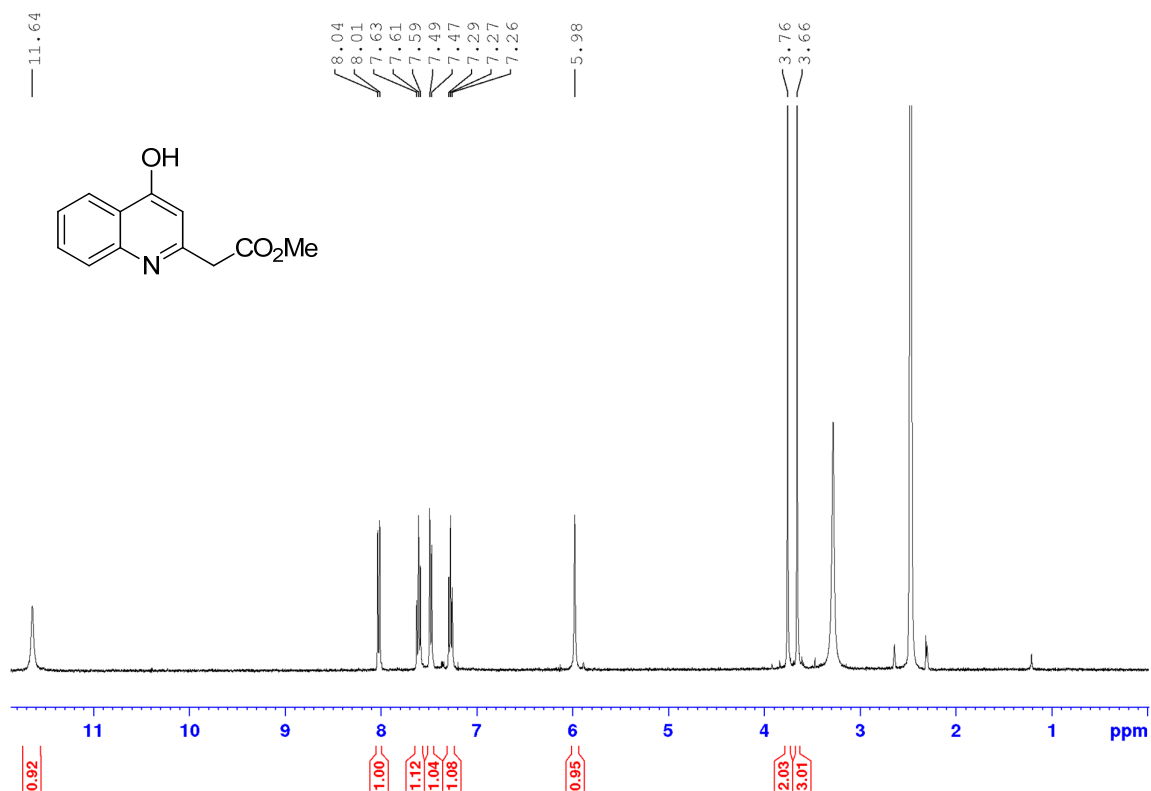

Figure S1. <sup>1</sup>H NMR spectrum of 4a

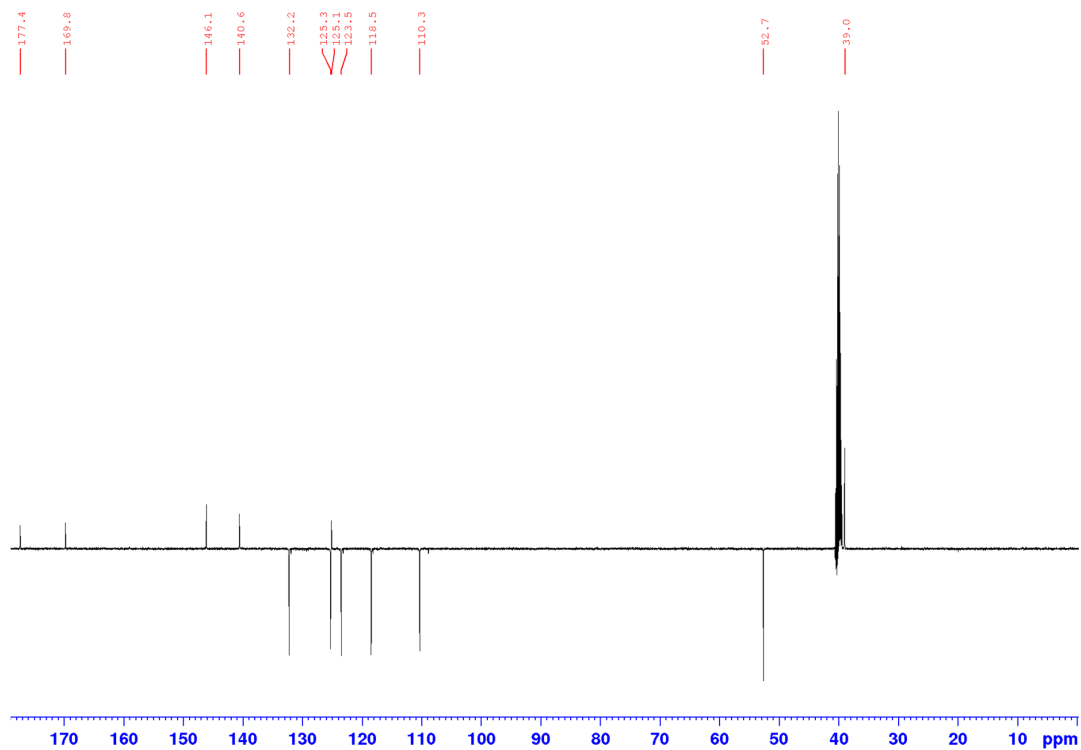

Figure S2. <sup>13</sup>C NMR spectrum of 4a

SZP-20220523-POS #412-441 RT: 2.12-2.26 AV: 30 NL: 1.43E9  
T: FTMS + p ESI Full ms [125.0000-1000.0000]

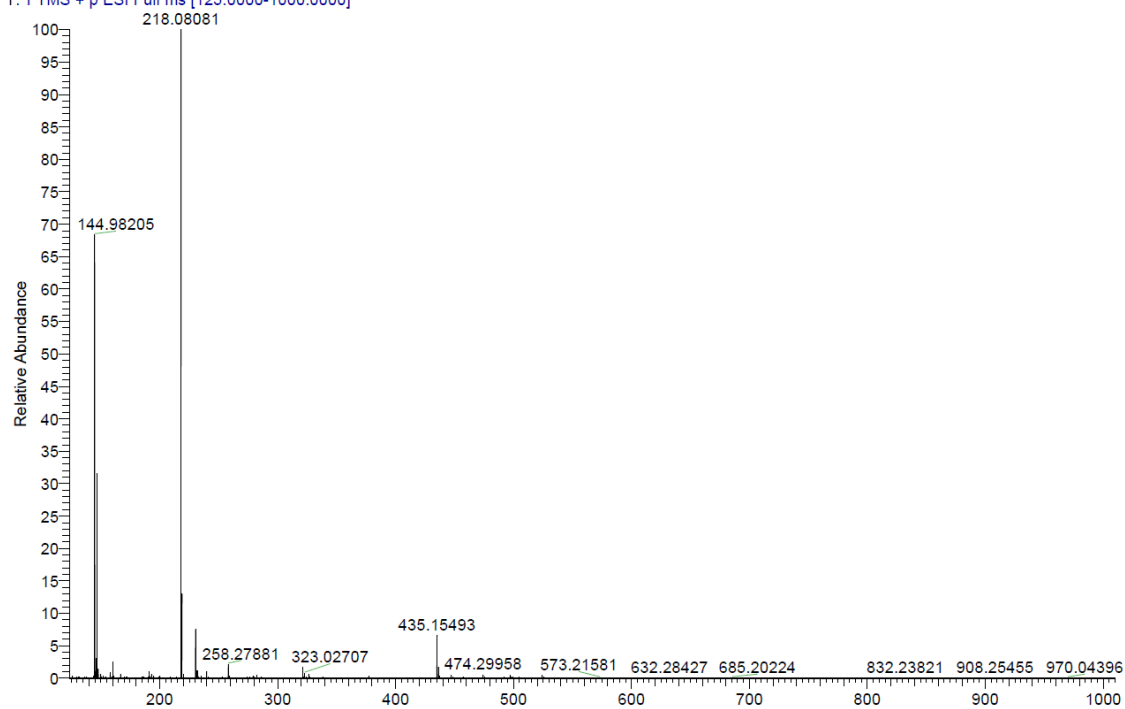

Figure S3. HRMS spectrum of **4a**

Ethyl 2-(4-hydroxyquinolin-2-yl) acetate (**4b**)

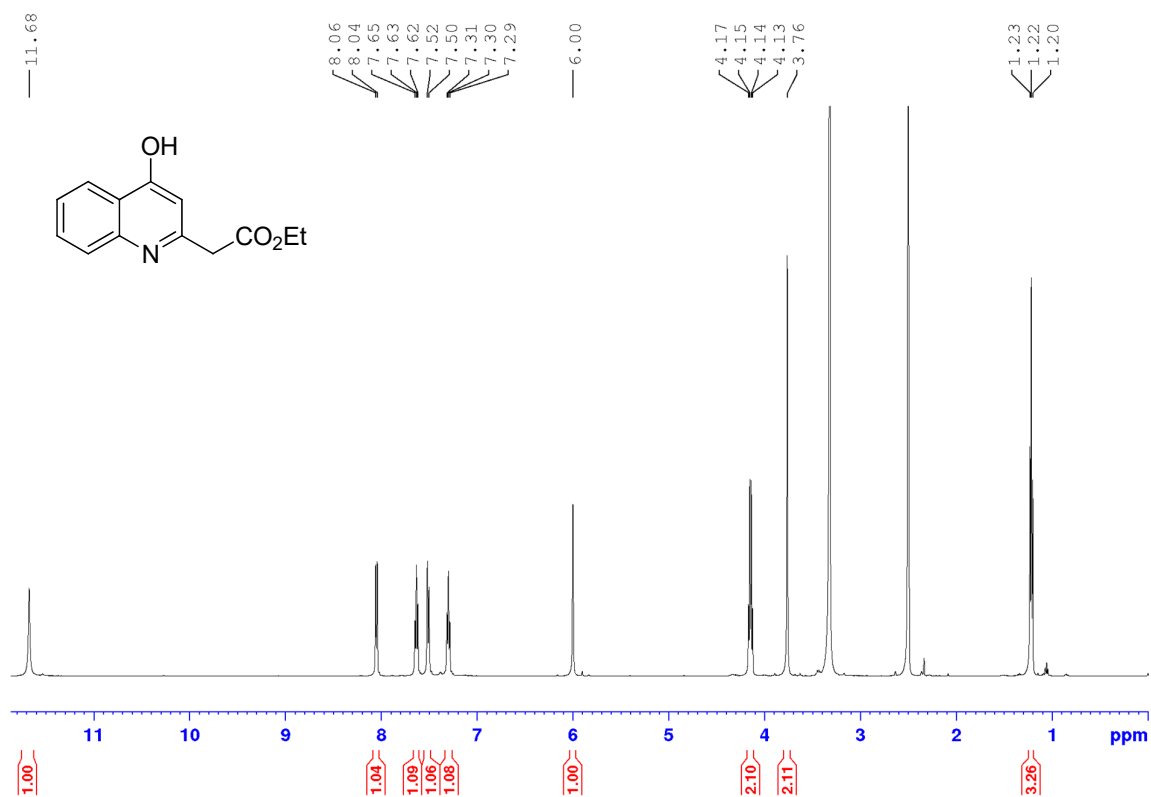

Figure S4. <sup>1</sup>H NMR spectrum of **4b**

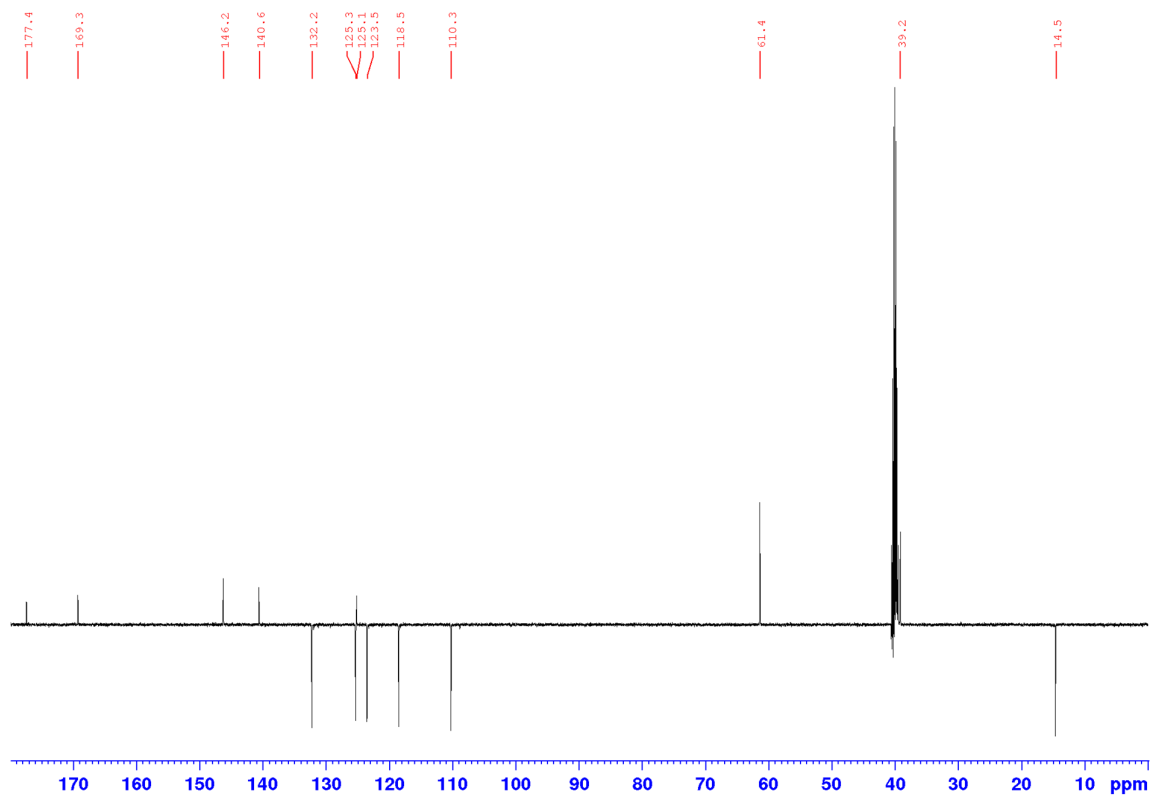

Figure S5. <sup>13</sup>C NMR spectrum of **4b**

SZP-20220523-POS #901-923 RT: 4.63-4.75 AV: 23 NL: 1.96E9  
T: FTMS + p ESI Full ms [125.0000-1000.0000]

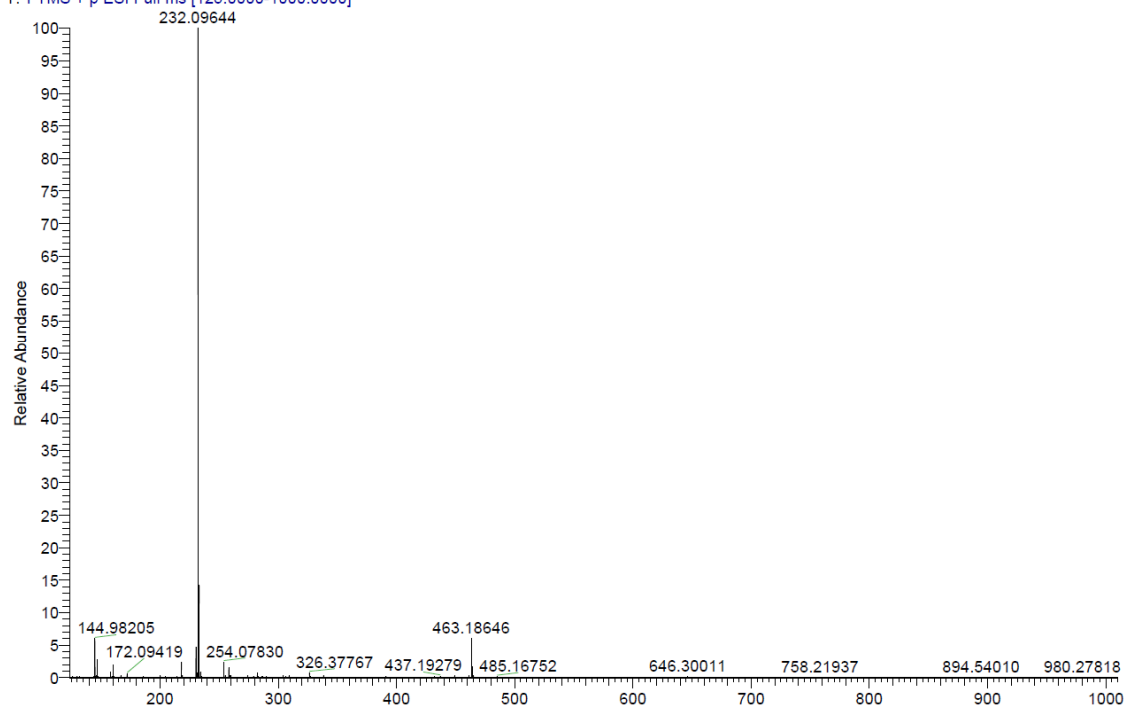

Figure S6. HRMS spectrum of **4b**

1-Phenyl-4-(phenylamino)pyridine-2,6(1*H*,3*H*)-dione (5)

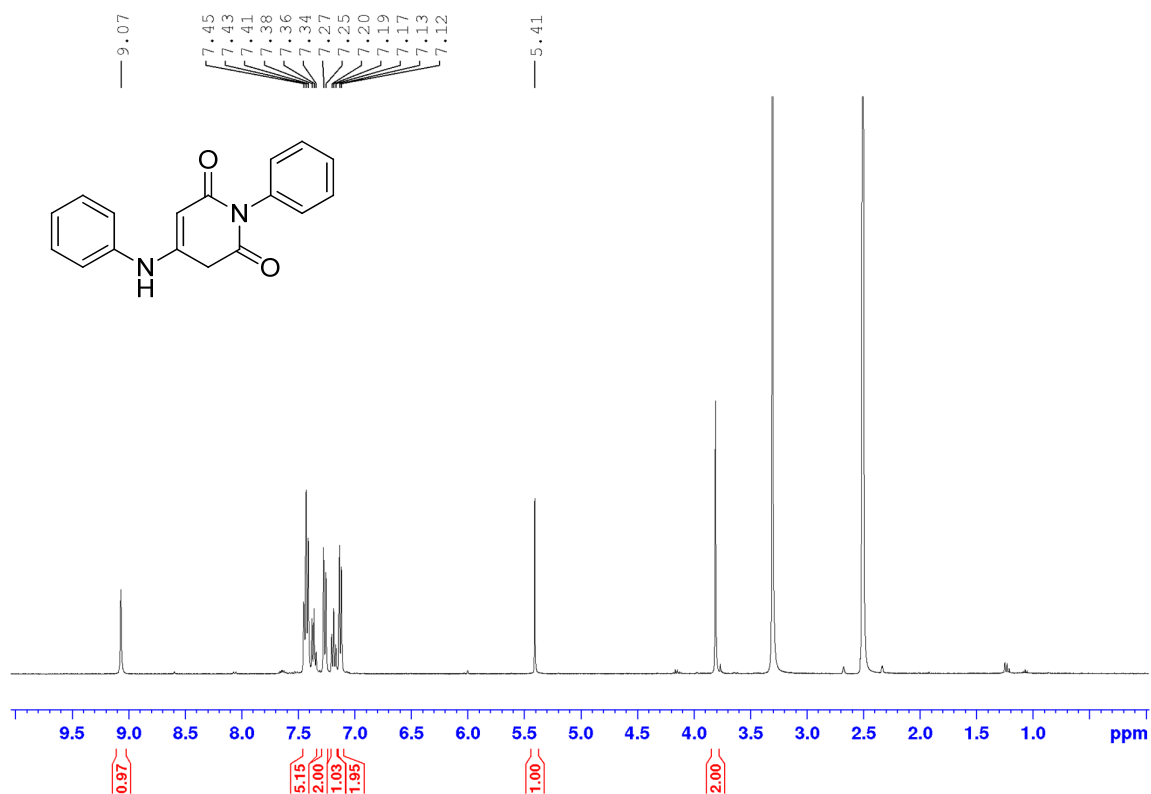

Figure S7. <sup>1</sup>H NMR spectrum of 5

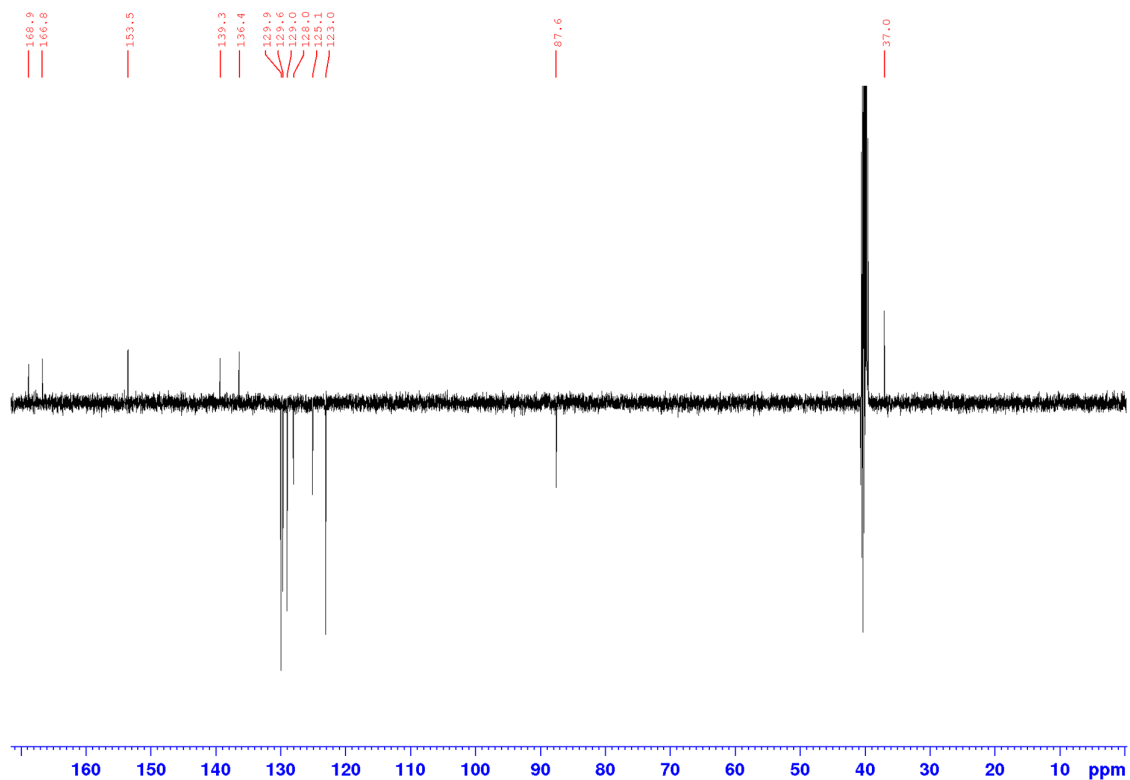

Figure S8. <sup>13</sup>C NMR spectrum of 5

SZP-20220523-POS #2367-2385 RT: 12.25-12.34 AV: 19 NL: 6.45E8  
T: FTMS + p ESI Full ms [125.0000-1000.0000]

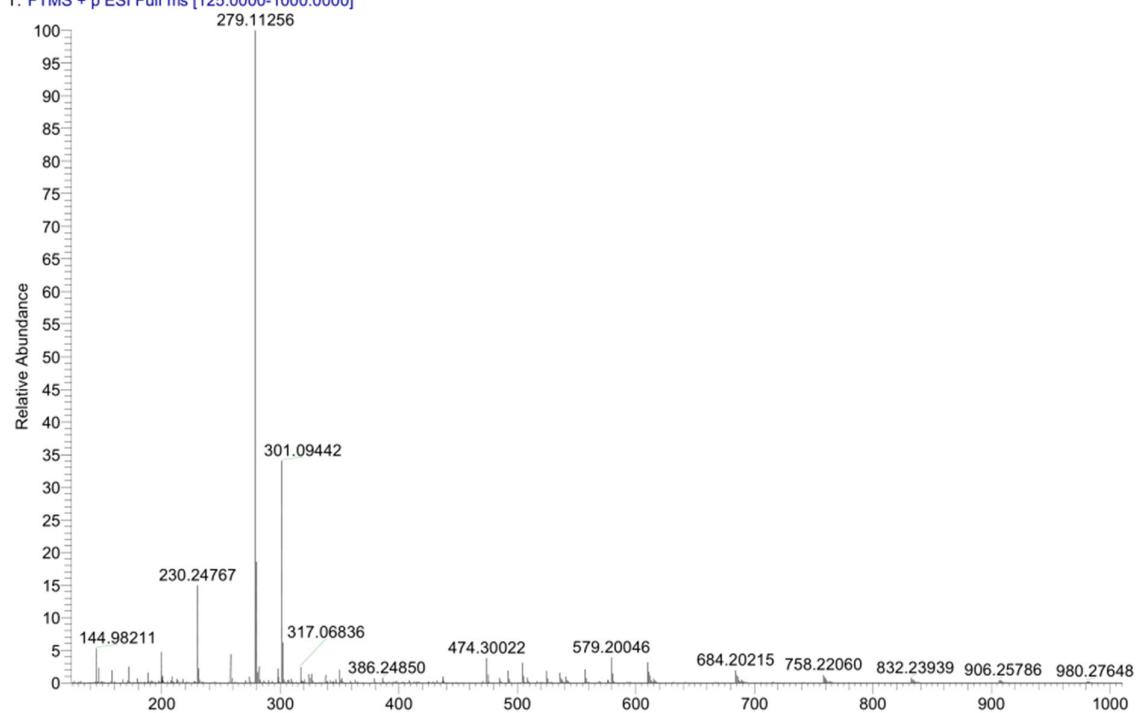

Figure S9. HRMS spectrum of 5

2,2'-(Propane-1,3-diyl)bis(quinolin-4-ol) (7)

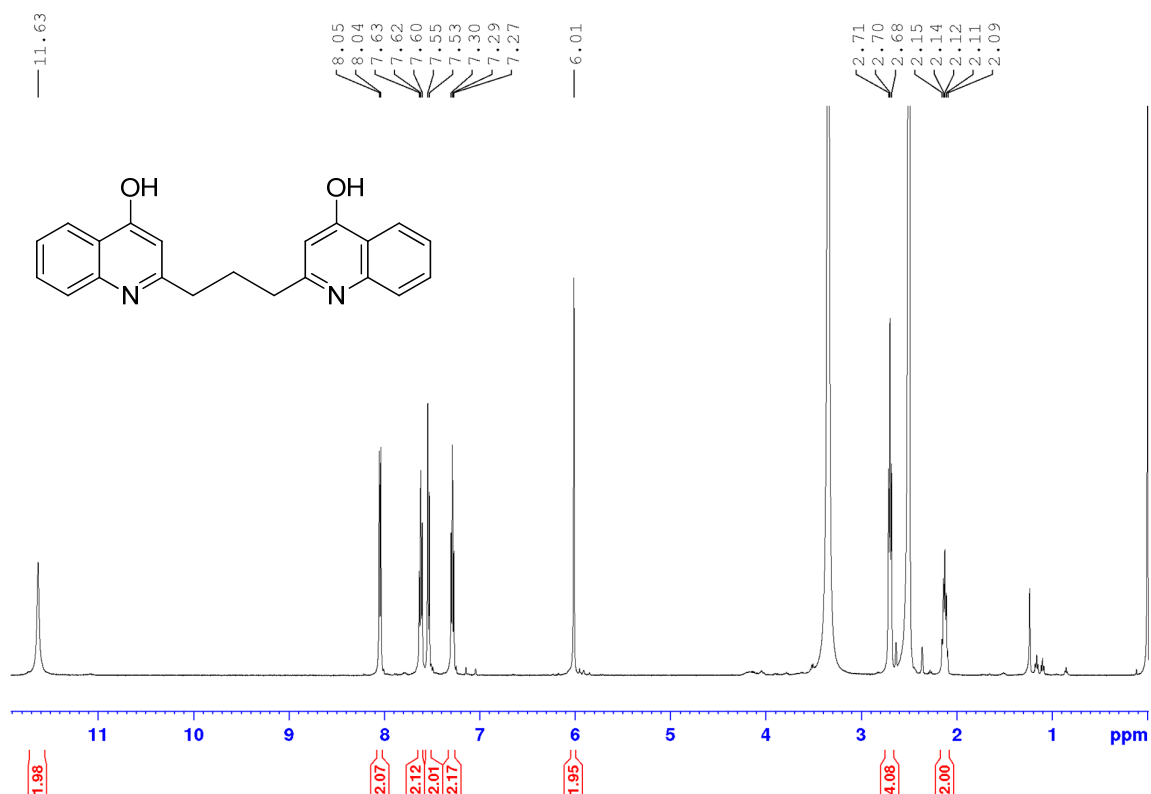

Figure S10. <sup>1</sup>H NMR spectrum of 7

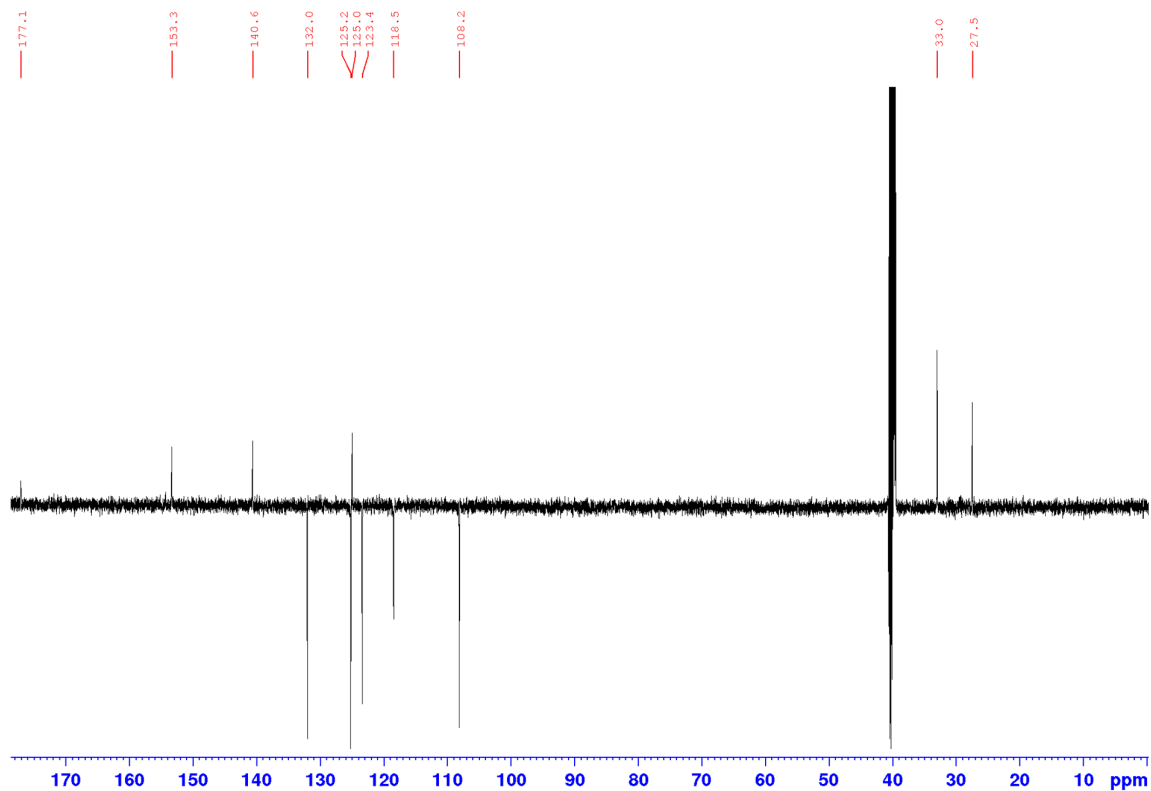

Figure S11. <sup>13</sup>C NMR spectrum of 7



SZP-20220523-POS #4711-4725 RT: 24.46-24.53 AV: 15 NL: 1.09E9  
T: FTMS + p ESI Full ms [125.0000-1000.0000]

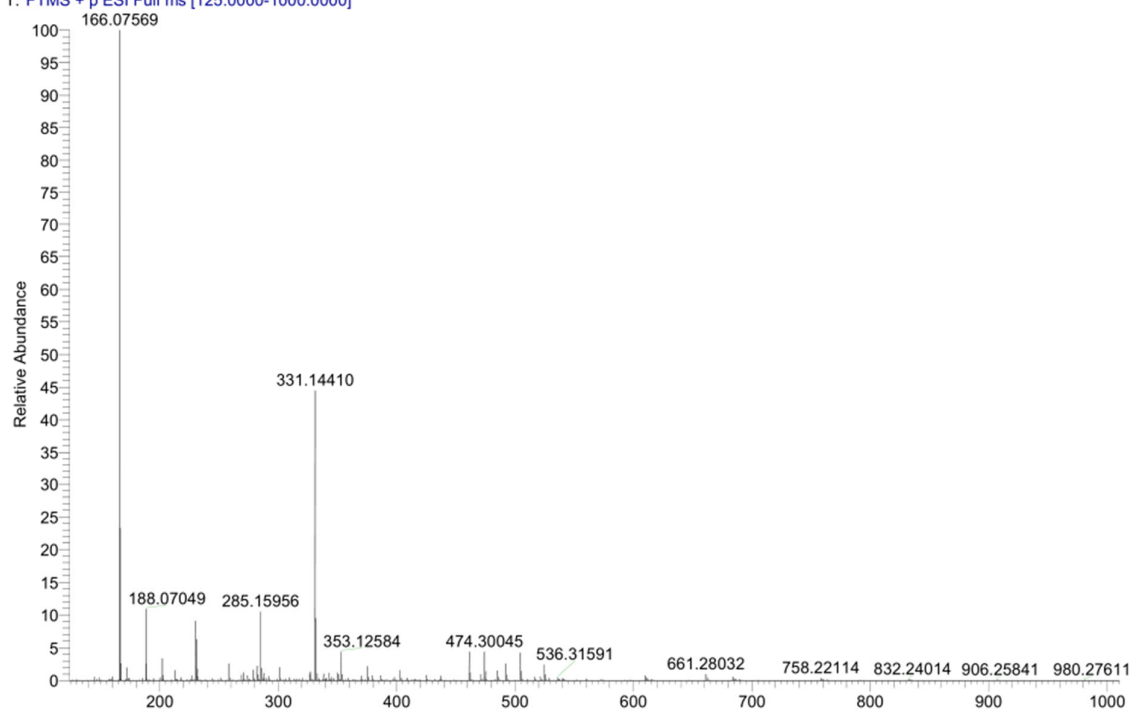

Figure S12. HRMS spectrum of 7

2,2'-(2-Phenylpropane-1,3-diyl)bis(quinolin-4-ol) (**12**)

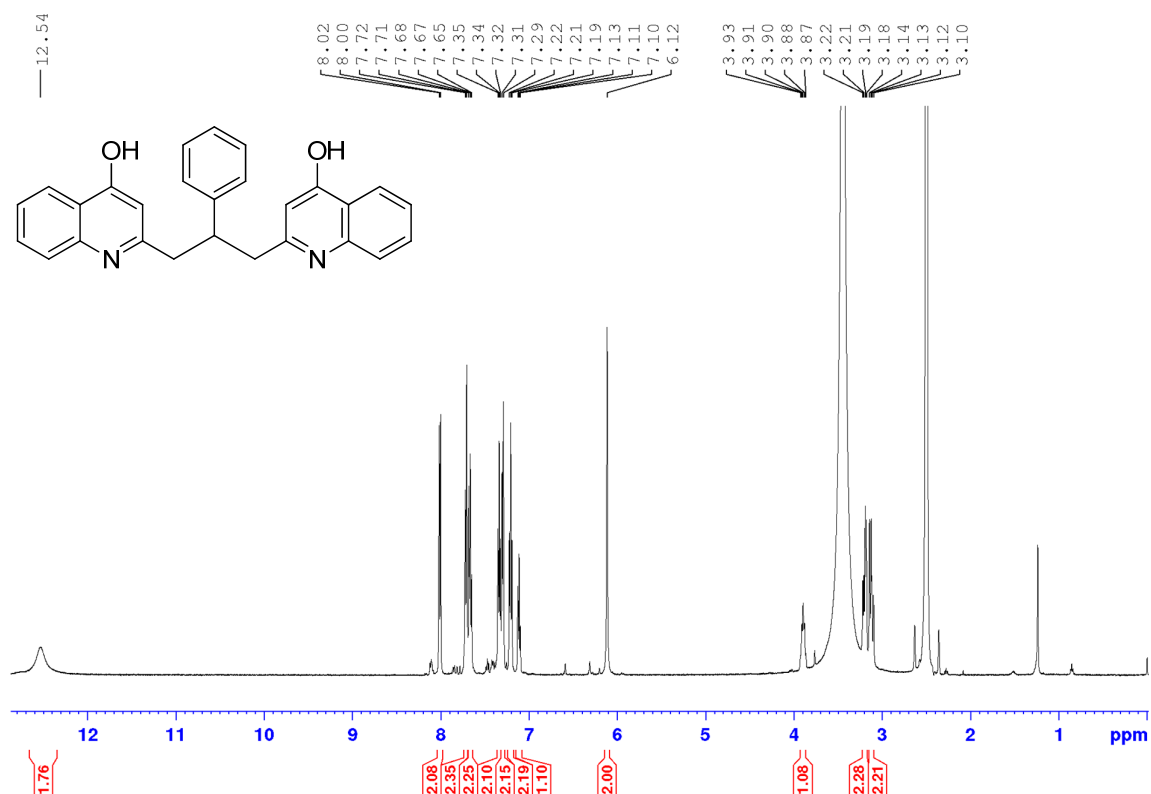

Figure S13. <sup>1</sup>H NMR spectrum of **12**

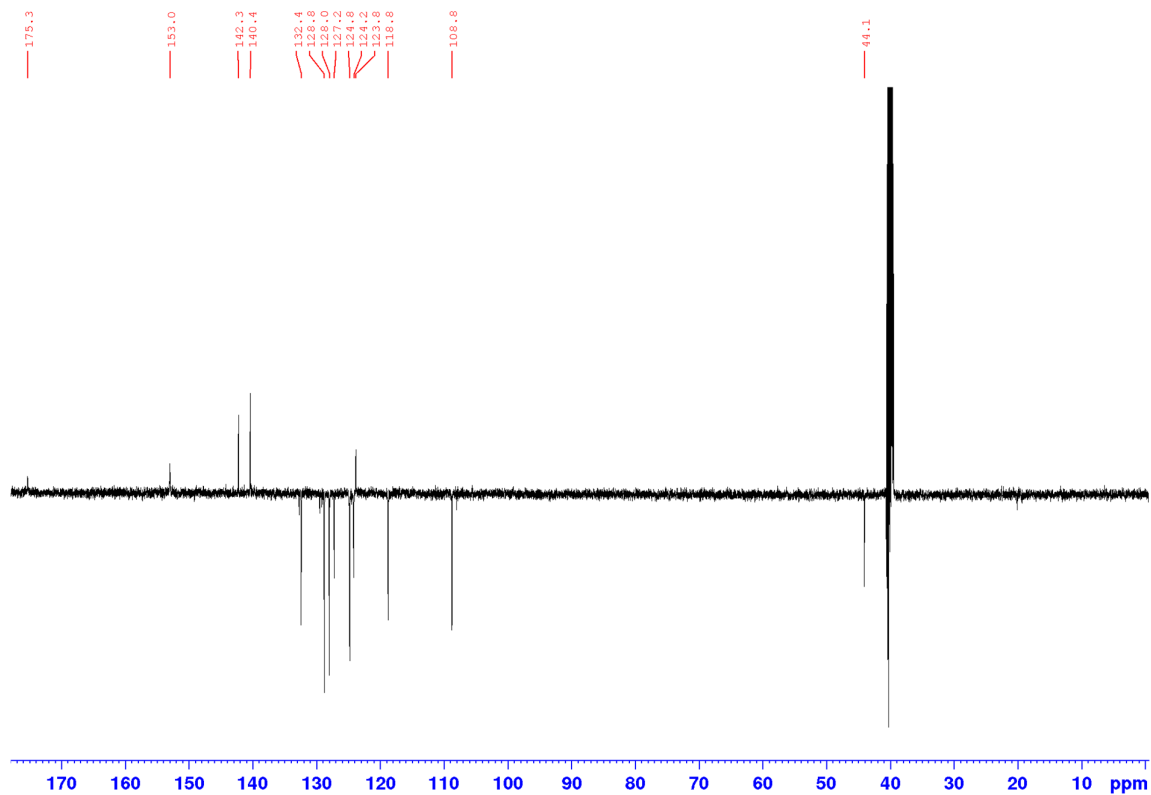

Figure S14. <sup>13</sup>C NMR spectrum of **12**

SZP-20220523-POS #4848-4874 RT: 25.17-25.30 AV: 27 NL: 1.12E9  
T: FTMS + p ESI Full ms [125.0000-1000.0000]

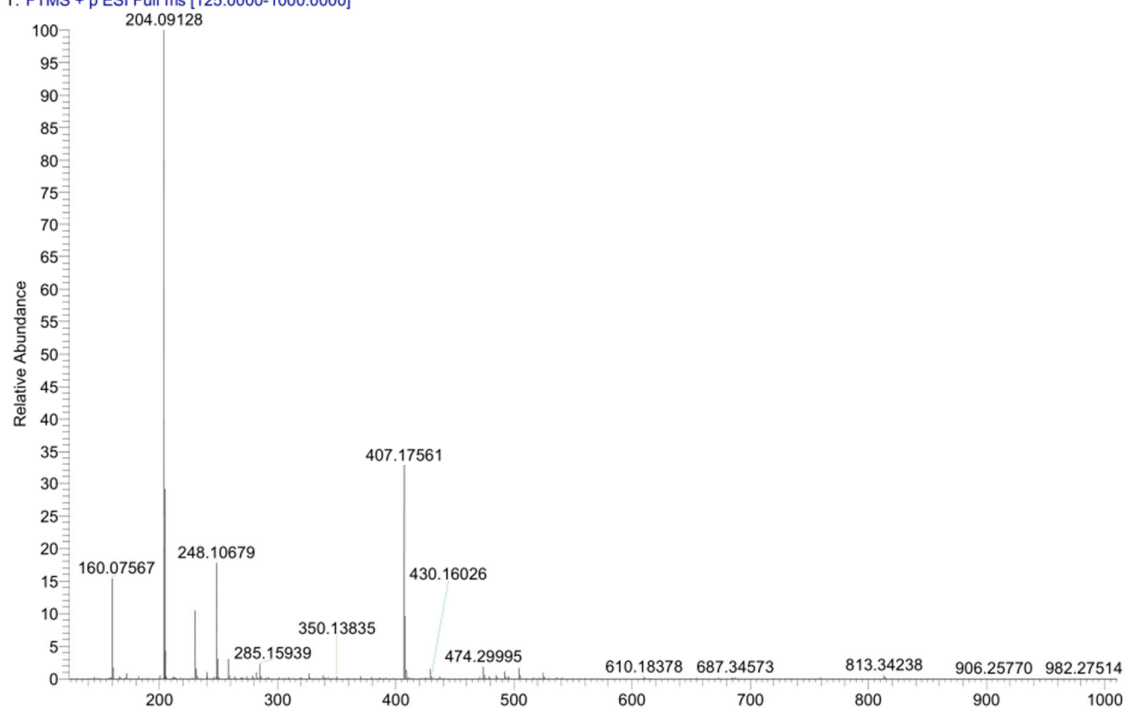

Figure S15. HRMS spectrum of 12

2-(4-hydroxyquinolin-2-yl)acetic acid (8)

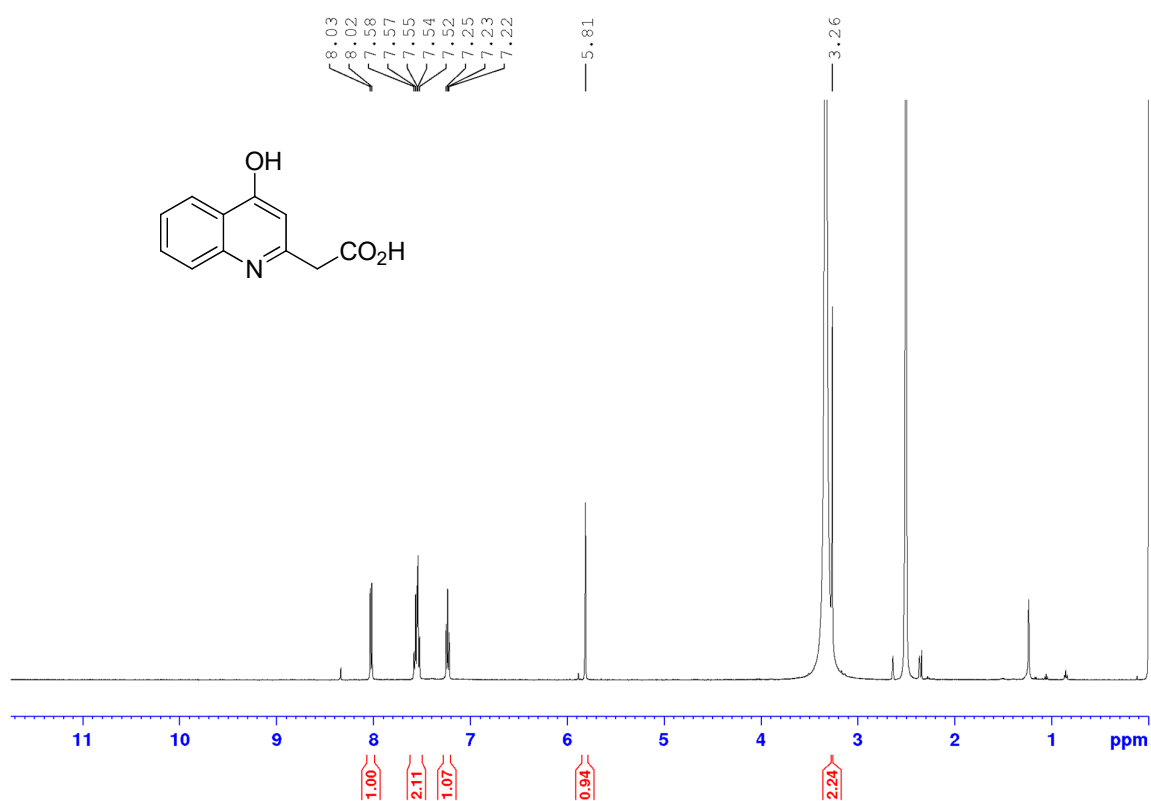

Figure S16. <sup>1</sup>H NMR spectrum of 8

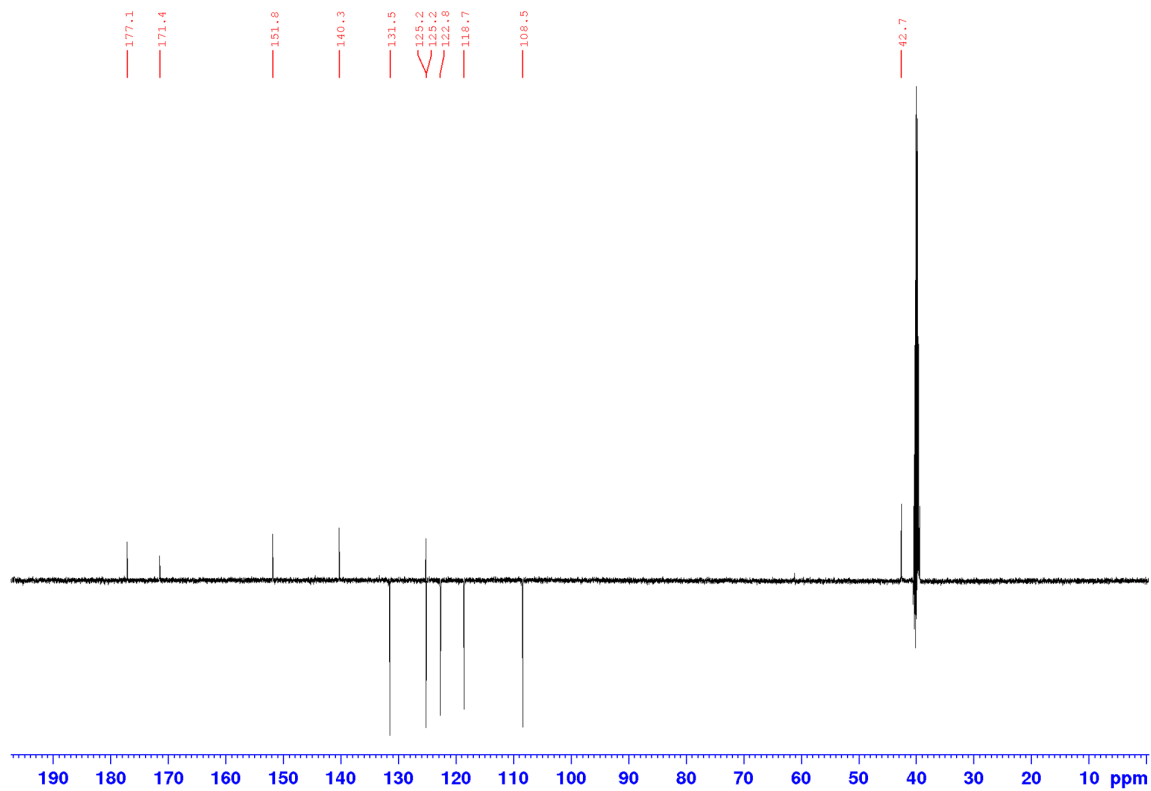

Figure S17. <sup>13</sup>C NMR spectrum of 8

CSO-220617-POS #1478-1492 RT: 8.44-8.51 AV: 15 NL: 8.63E8  
T: FTMS + p ESI Full lock ms [150.0000-1000.0000]

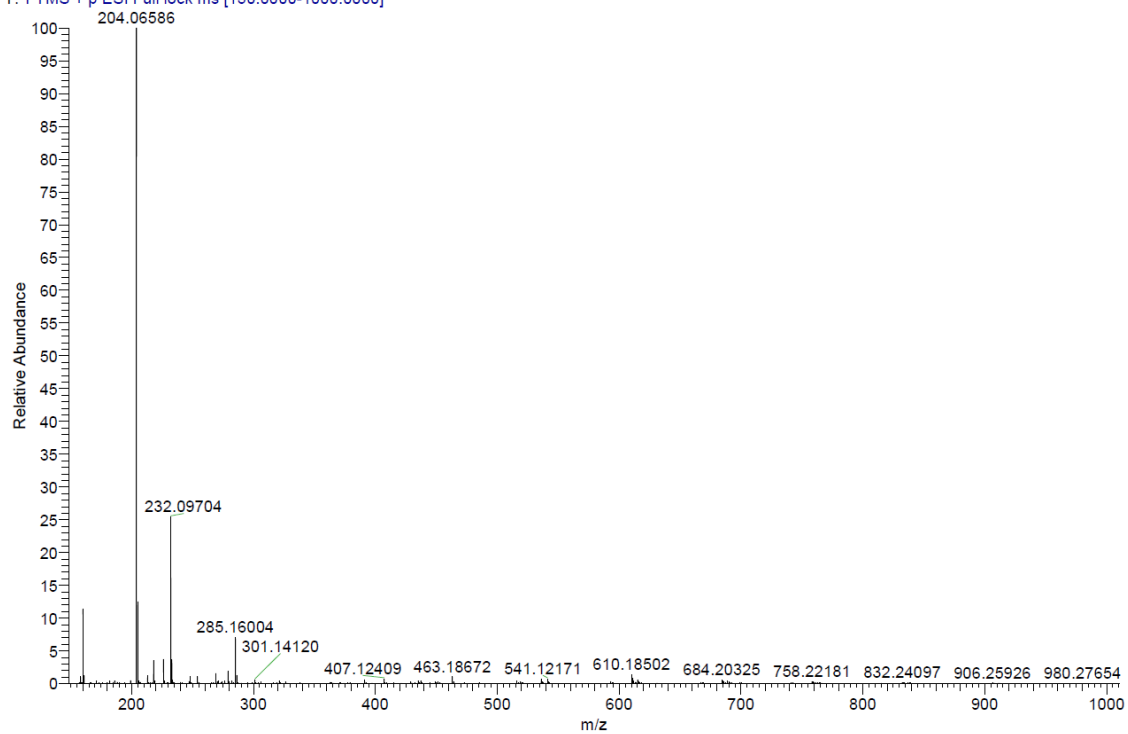

Figure S18. HRMS spectrum of 8

3-(Piperidin-1-ylmethyl)-1*H*-azeto[1,2-*a*]quinolin-4(2*H*)-one (9)

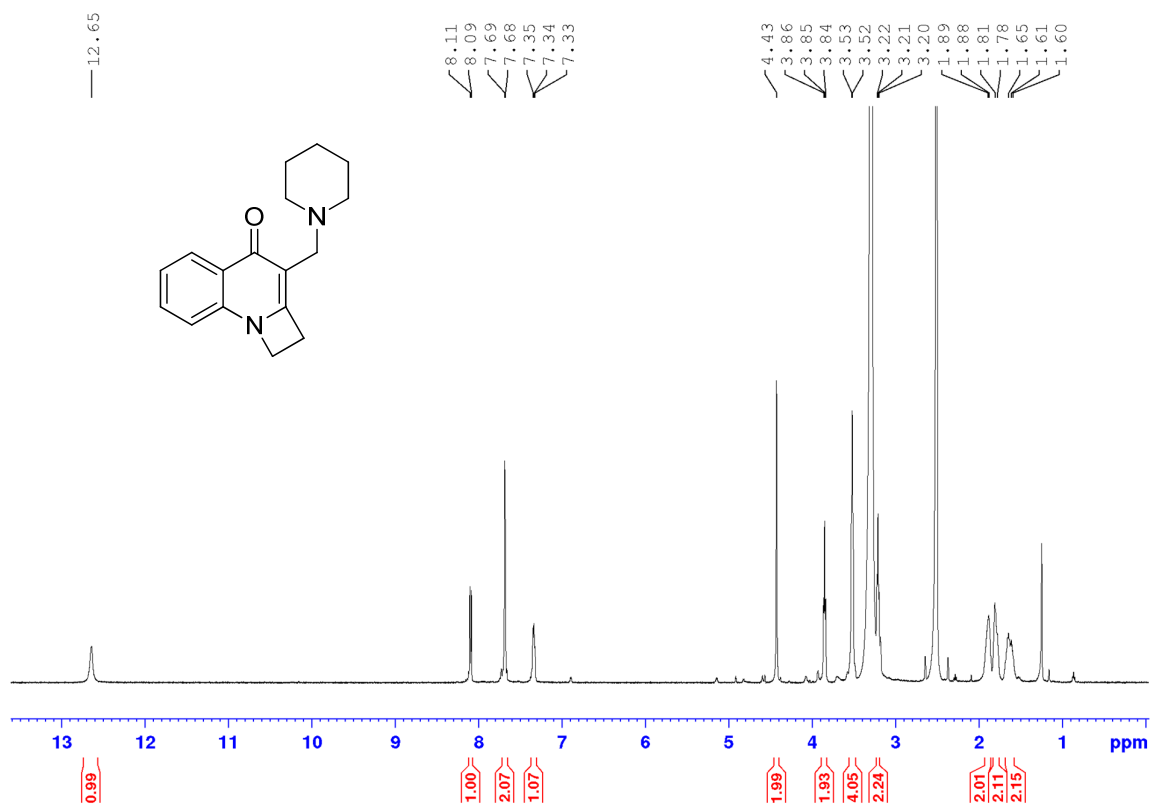

Figure S19. <sup>1</sup>H NMR spectrum of 9

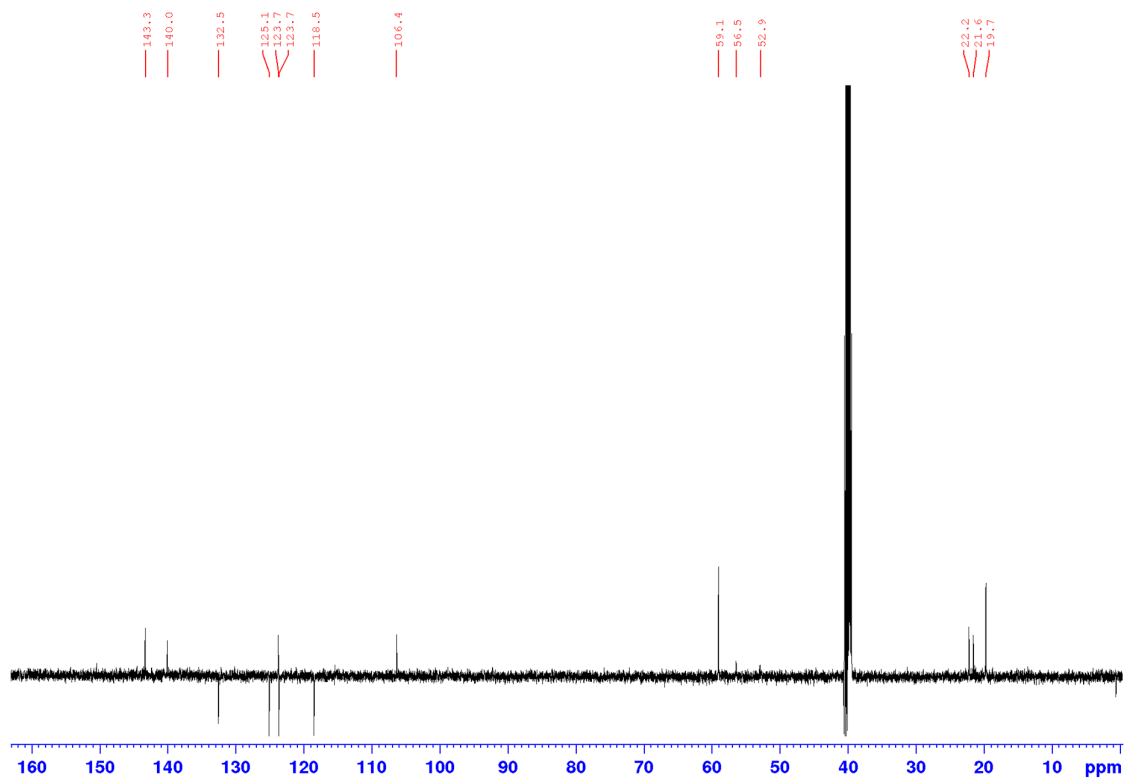

Figure S20. <sup>13</sup>C NMR spectrum of 9

CSO-220617-POS #1310-1324 RT: 7.46-7.54 AV: 15 NL: 1.20E8  
T: FTMS + p ESI Full lock ms [150.0000-1000.0000]

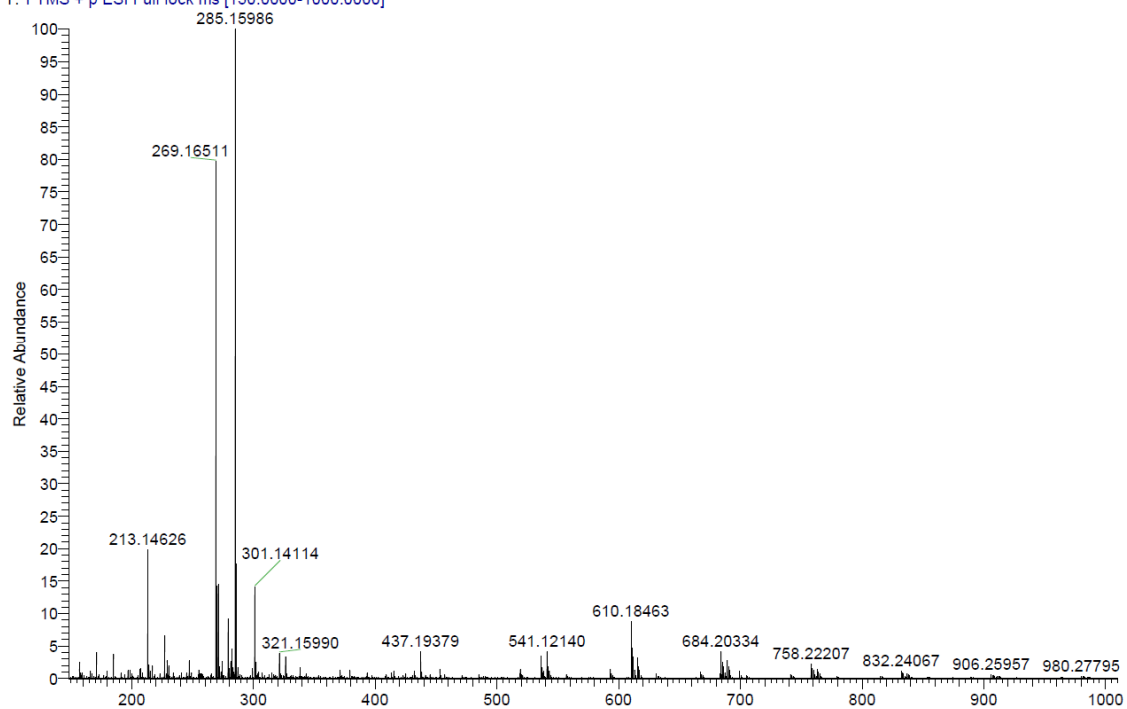

Figure S21. HRMS spectrum of **9**

Methyl 2-(4-hydroxy-3-(piperidin-1-ylmethyl)quinolin-2-yl) acetate (10a)

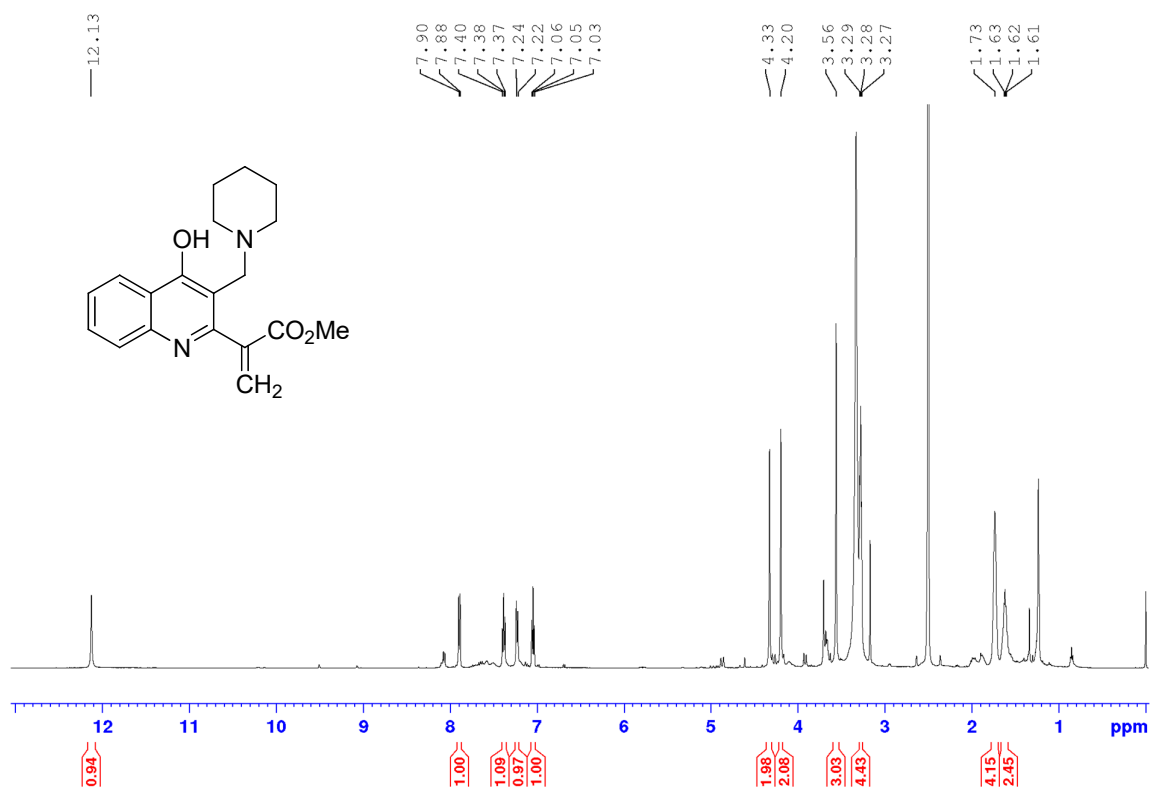

Figure S22. <sup>1</sup>H NMR spectrum of 10a

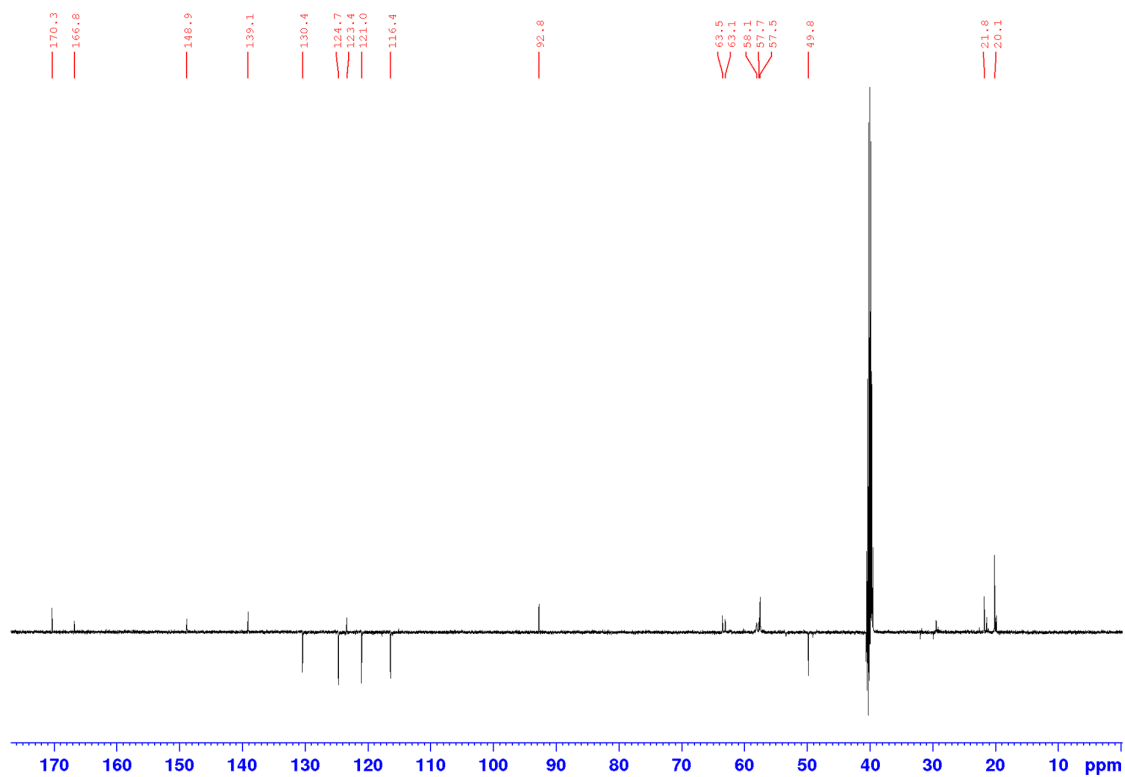

Figure S23. <sup>13</sup>C NMR spectrum of 10a



SZP-20220523-POS #4552-4584 RT: 23.63-23.79 AV: 33 NL: 7.63E8  
T: FTMS + p ESI Full ms [125.0000-1000.0000]

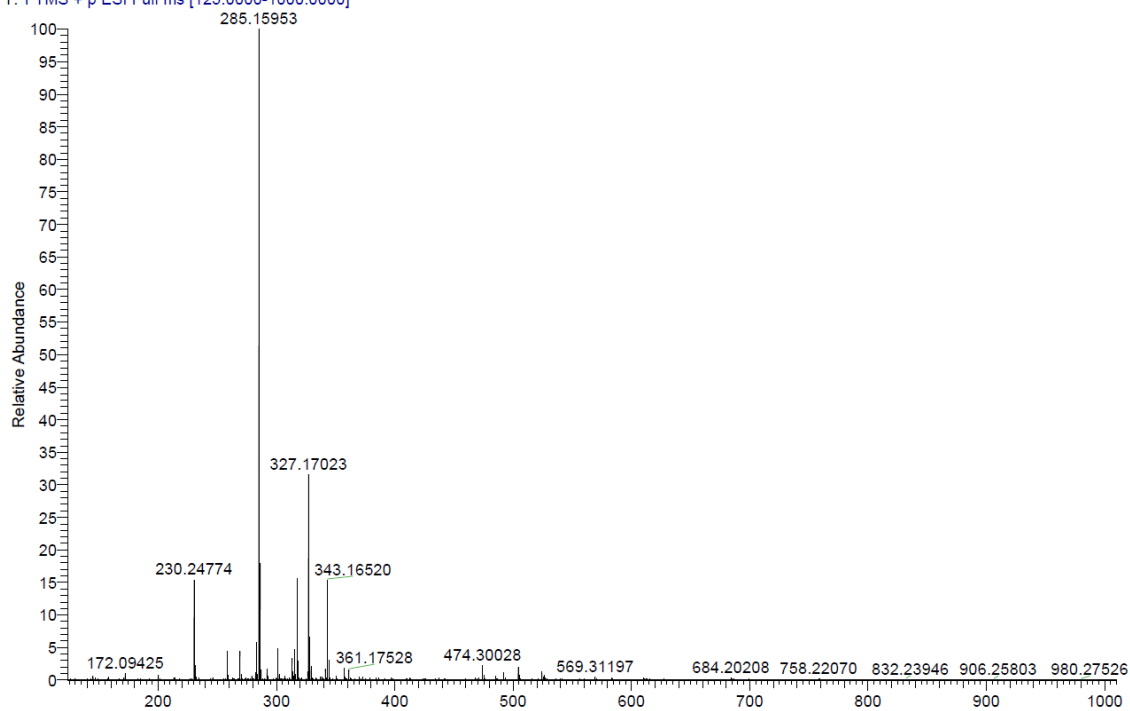

Figure S24. HRMS spectrum of 10a

Ethyl 2-(4-hydroxy-3-(piperidin-1-ylmethyl)quinolin-2-yl) acetate (**10b**)

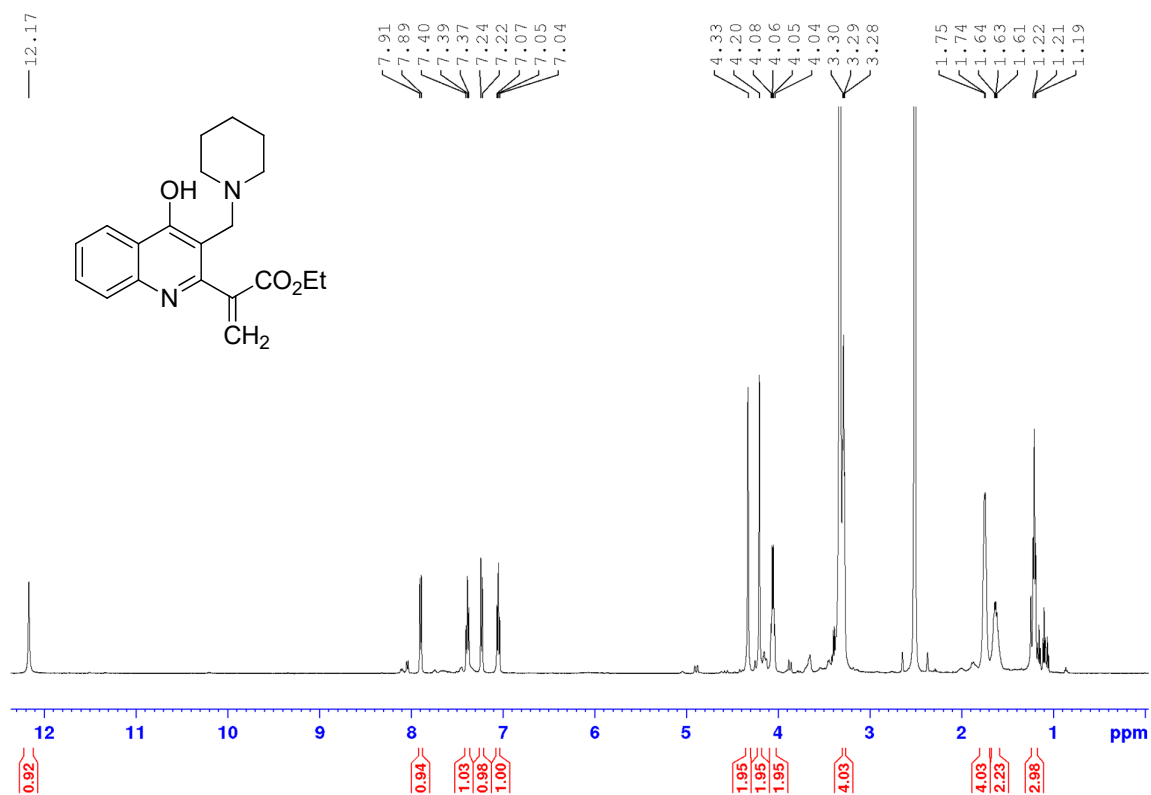

Figure S25. <sup>1</sup>H NMR spectrum of **10b**

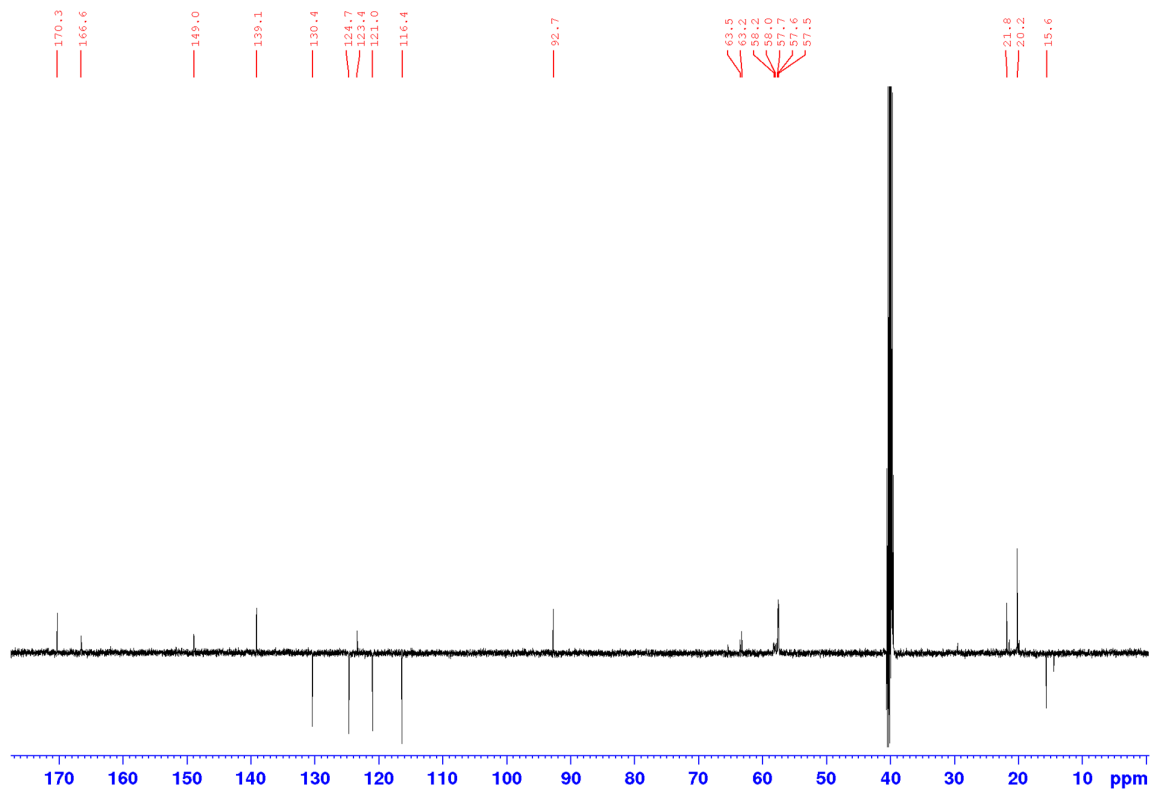

Figure S26. <sup>13</sup>C NMR spectrum of **10b**

SZP-20220523-POS #4037-4073 RT: 20.95-21.13 AV: 37 NL: 9.87E8  
T: FTMS + p ESI Full ms [125.0000-1000.0000]

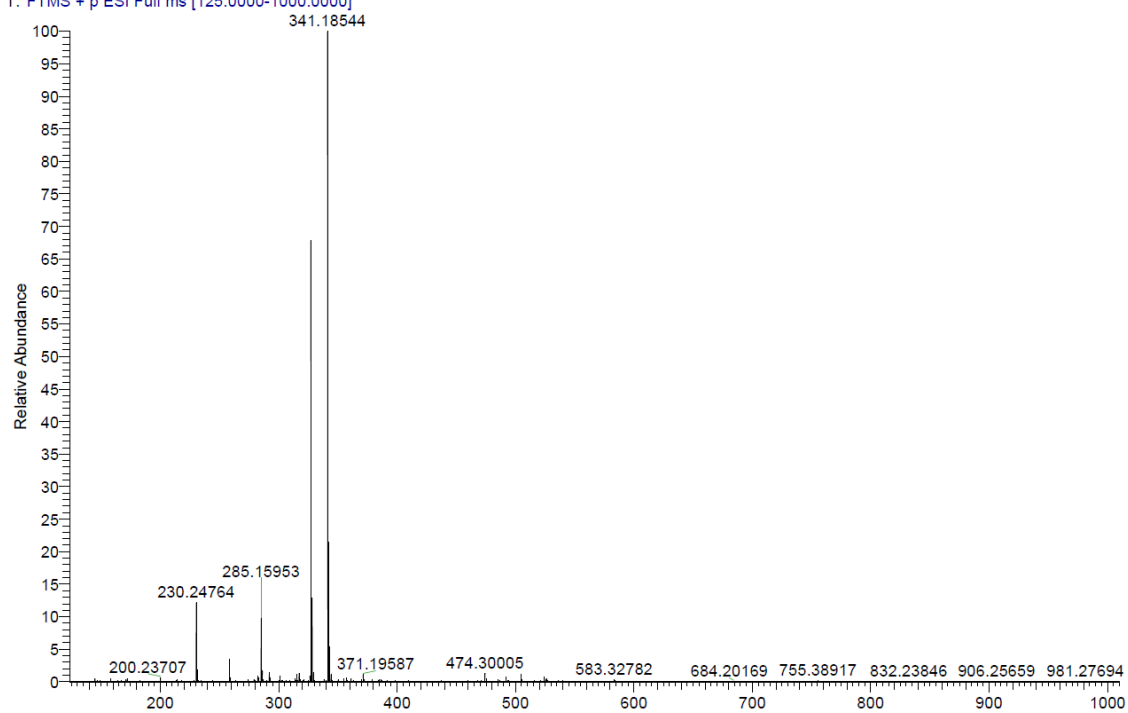

Figure S27. HRMS spectrum of **10b**

**(Z)-methyl 2-(4-hydroxyquinolin-2-yl)-3-phenylacrylate (13a)**

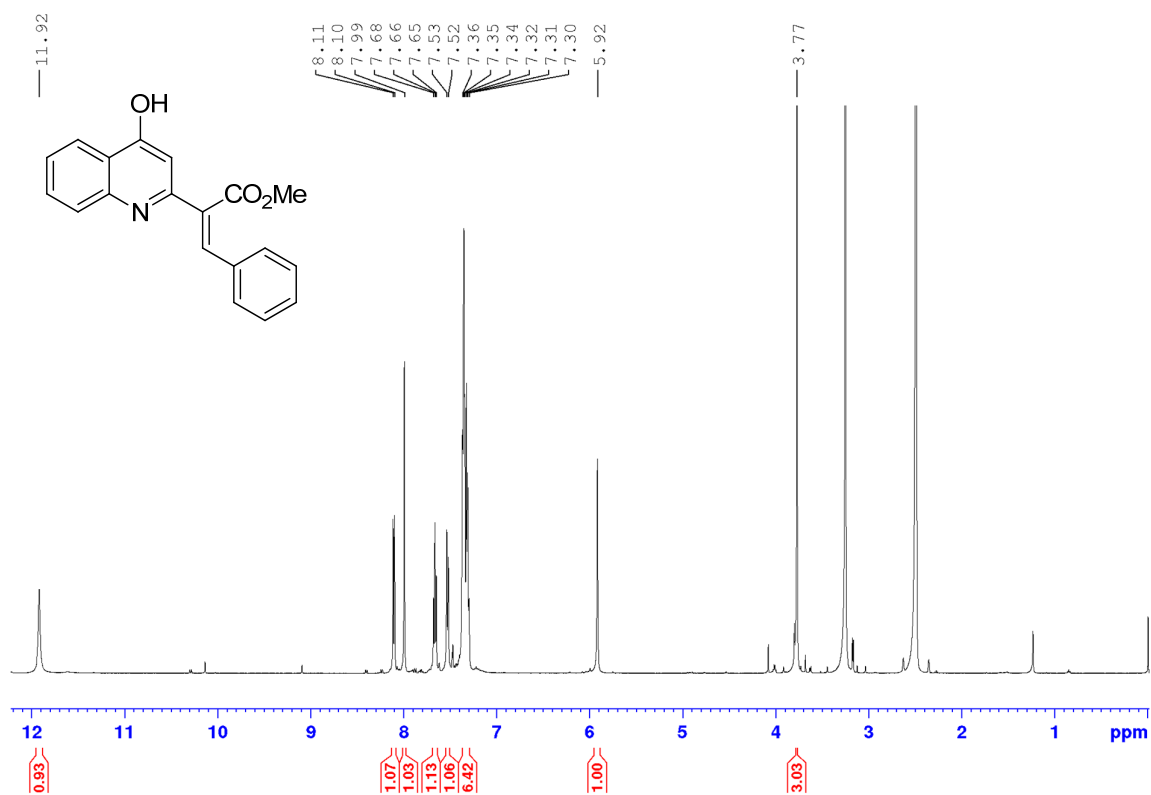

Figure S28. <sup>1</sup>H NMR spectrum of **13a**

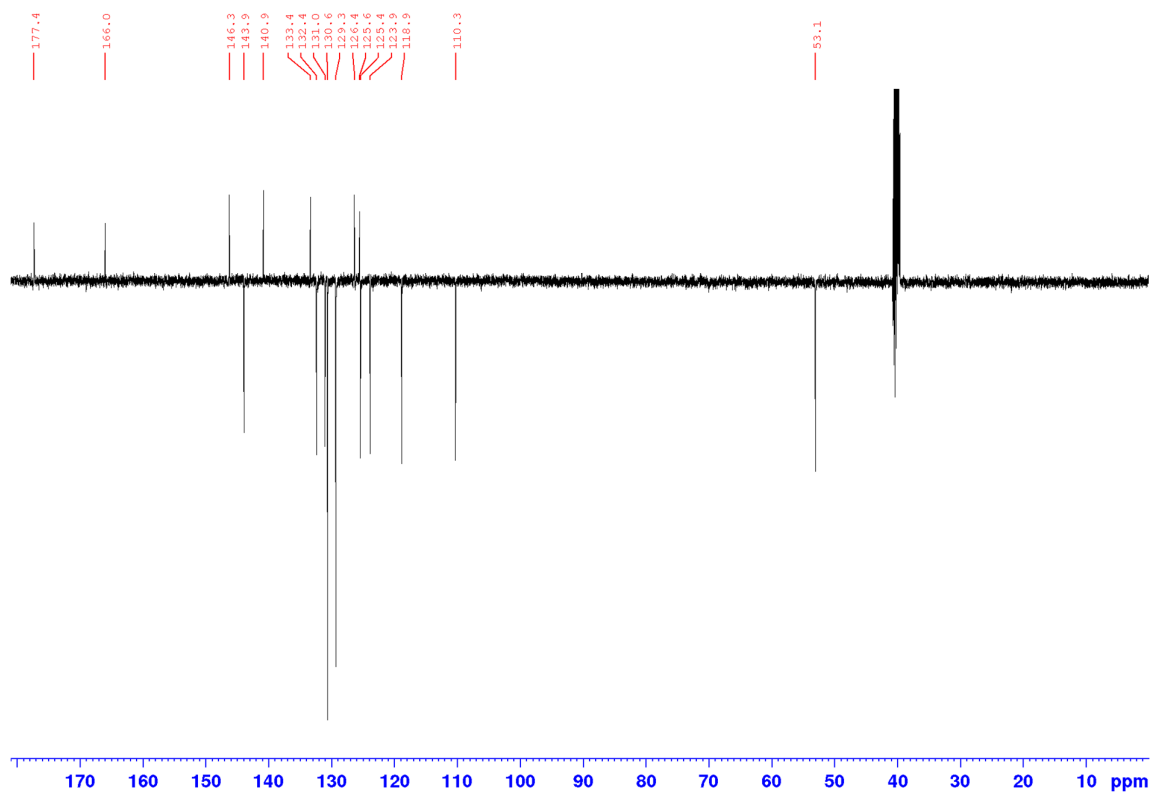

Figure S29. <sup>13</sup>C NMR spectrum of **13a**

SZP-20220523-POS #652-684 RT: 3.35-3.51 AV: 33 NL: 1.88E9  
T: FTMS + p ESI Full ms [125.0000-1000.0000]

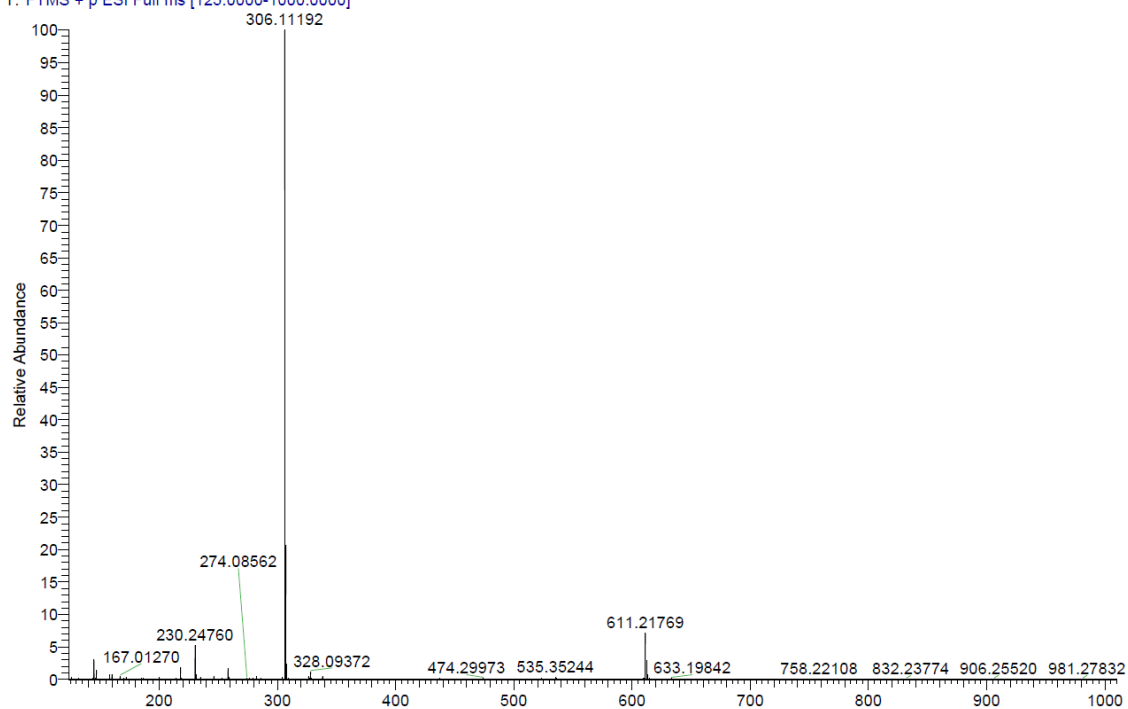

Figure S30. HRMS spectrum of **13a**

**(Z)-ethyl 2-(4-hydroxyquinolin-2-yl)-3-phenylacrylate (13b)**

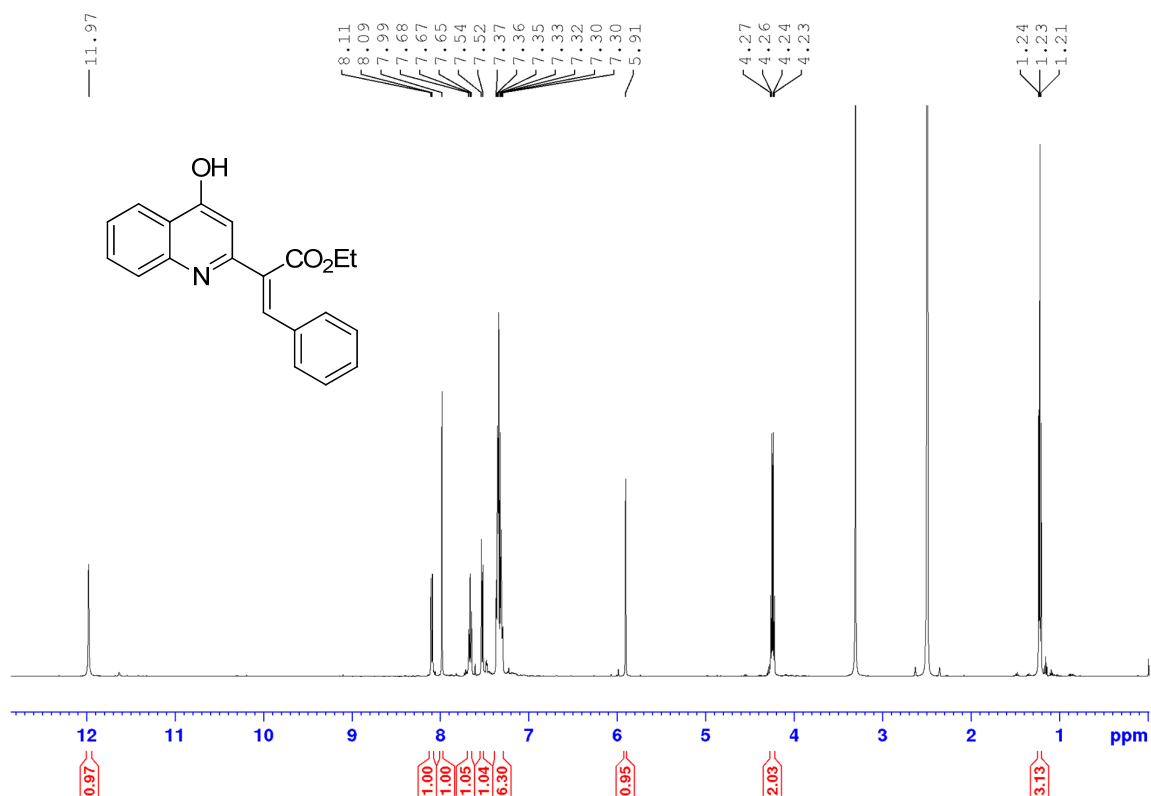

Figure S31. <sup>1</sup>H NMR spectrum of **13b**

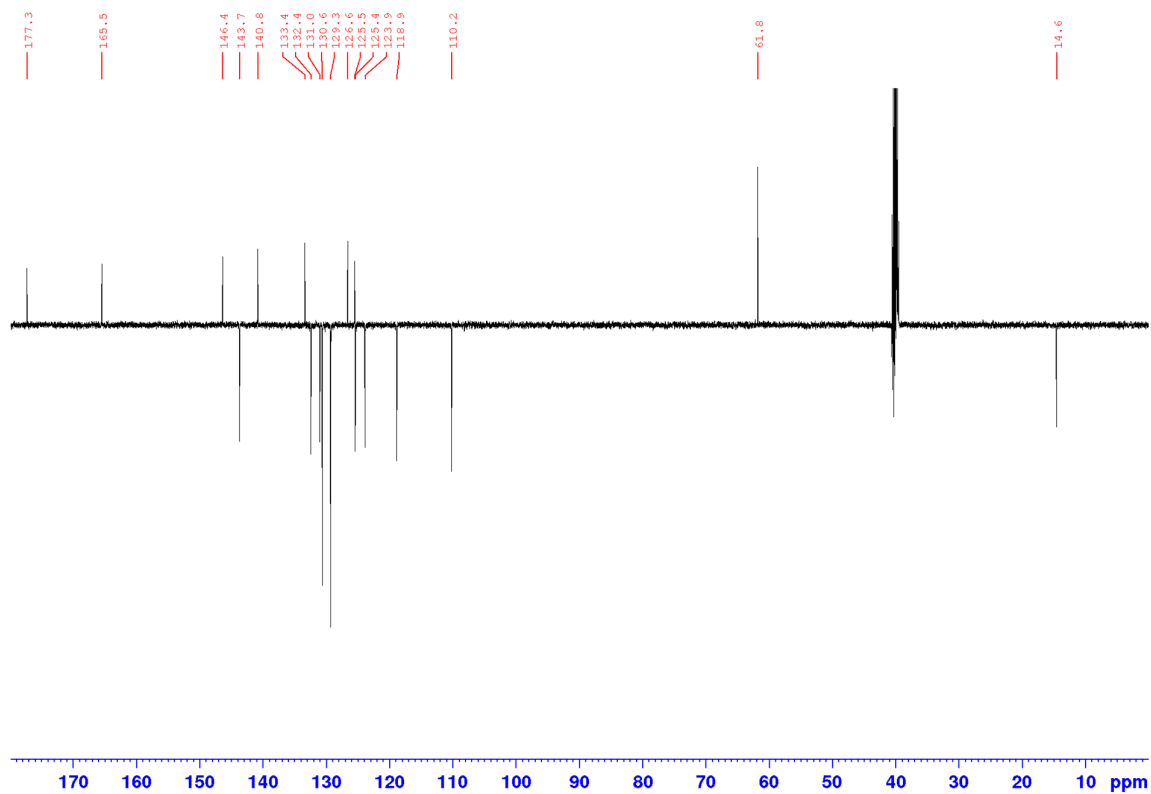

Figure S32. <sup>13</sup>C NMR spectrum of **13b**

SZP-20220523-POS #1103-1132 RT: 5.68-5.83 AV: 30 NL: 2.07E9  
T: FTMS + p ESI Full ms [125.0000-1000.0000]

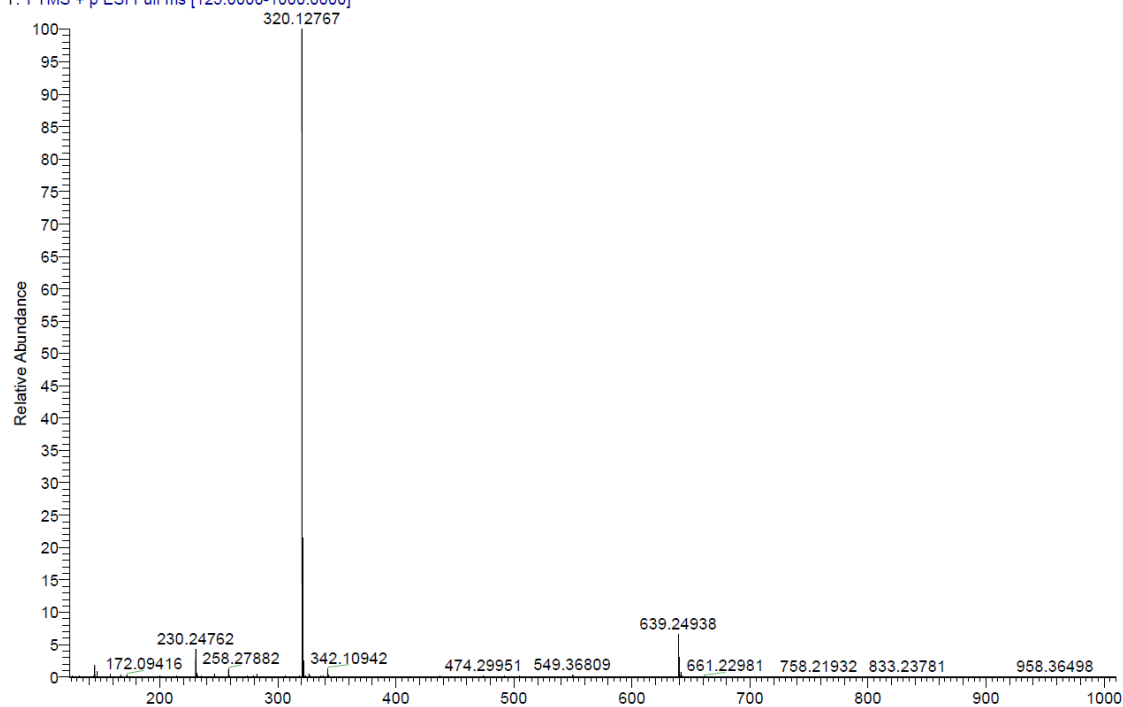

Figure S33. HRMS spectrum of **13b**

(Z)-ethyl 2-(4-hydroxyquinolin-2-yl)-3-(4-nitrophenyl)acrylate (**20**)

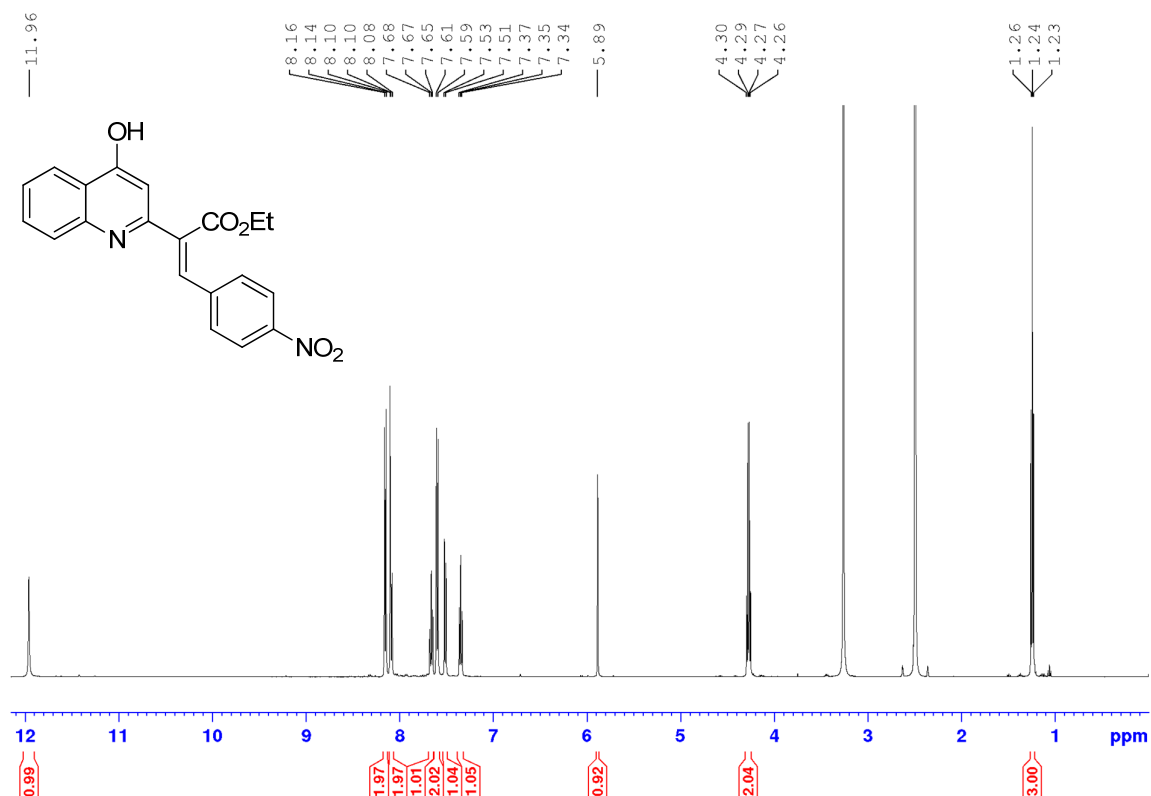

Figure S34. <sup>1</sup>H NMR spectrum of **20**

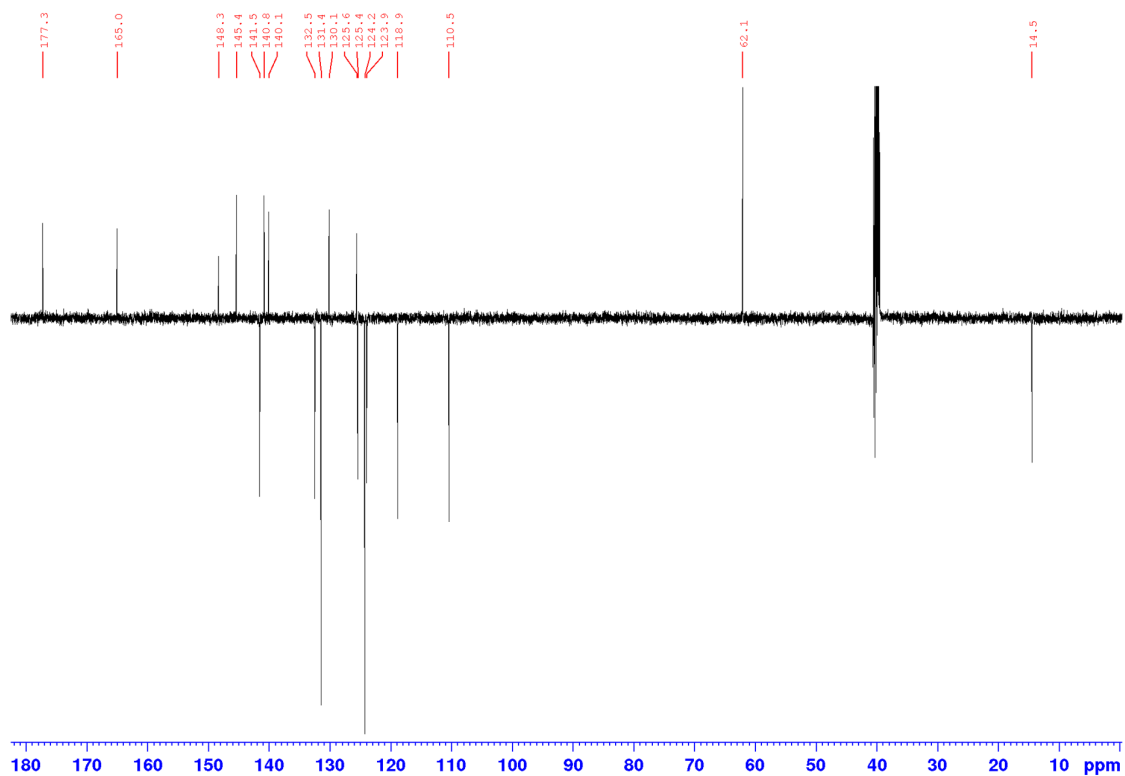

Figure S35. <sup>13</sup>C NMR spectrum of **20**



SZP-20220523-POS #1811-1833 RT: 9.36-9.47 AV: 23 NL: 1.25E9  
T: FTMS + p ESI Full ms [125.0000-1000.0000]

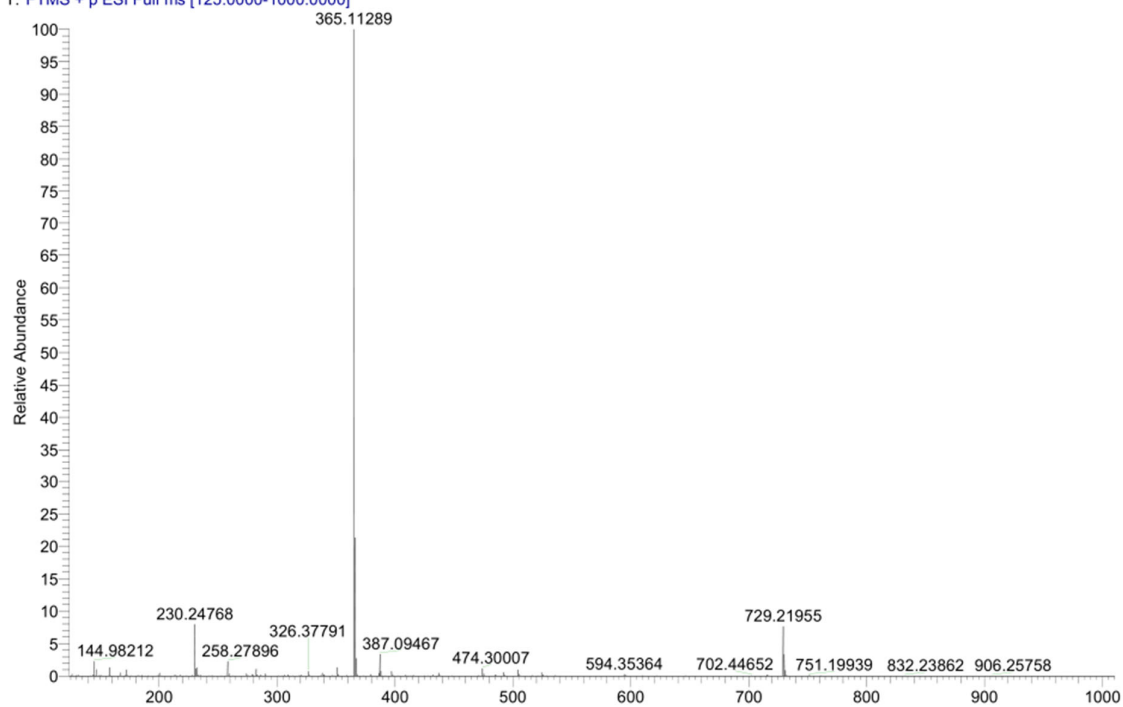

Figure S36. HRMS spectrum of 20

(Z)-ethyl 3-(4-fluorophenyl)-2-(4-hydroxyquinolin-2-yl)acrylate (**21**)

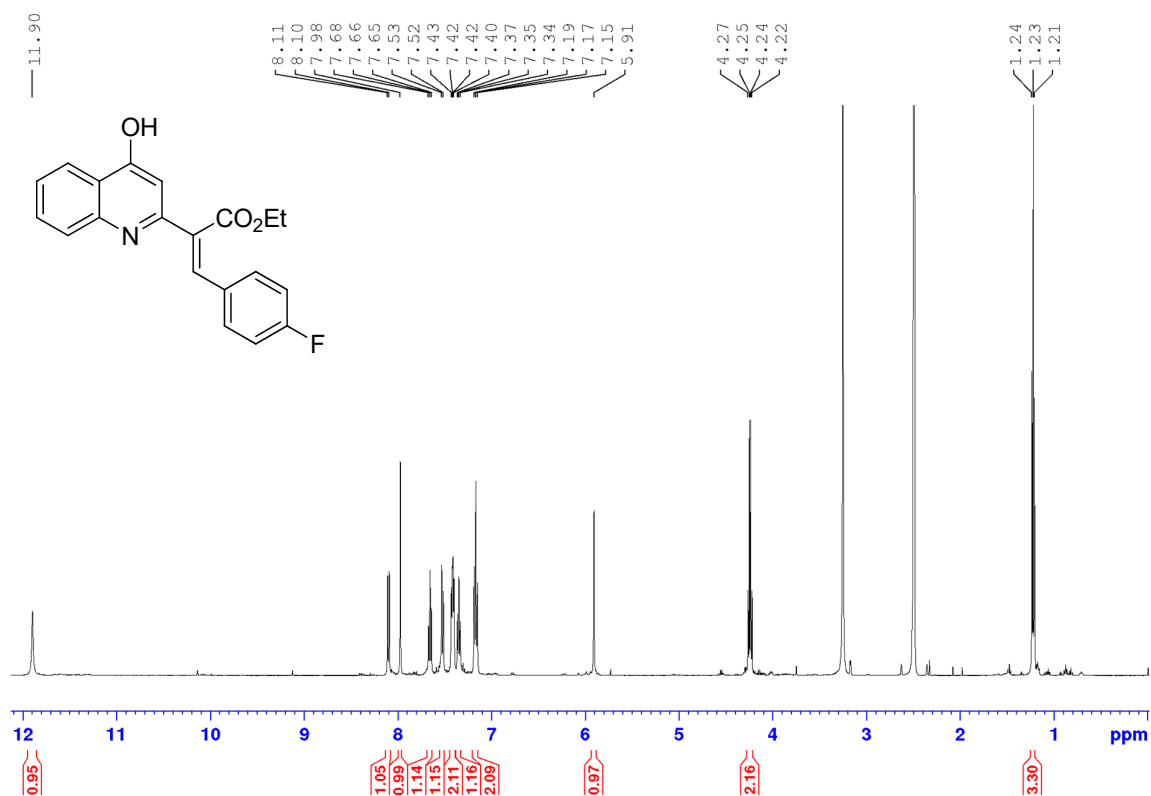

Figure S37. <sup>1</sup>H NMR spectrum of **21**

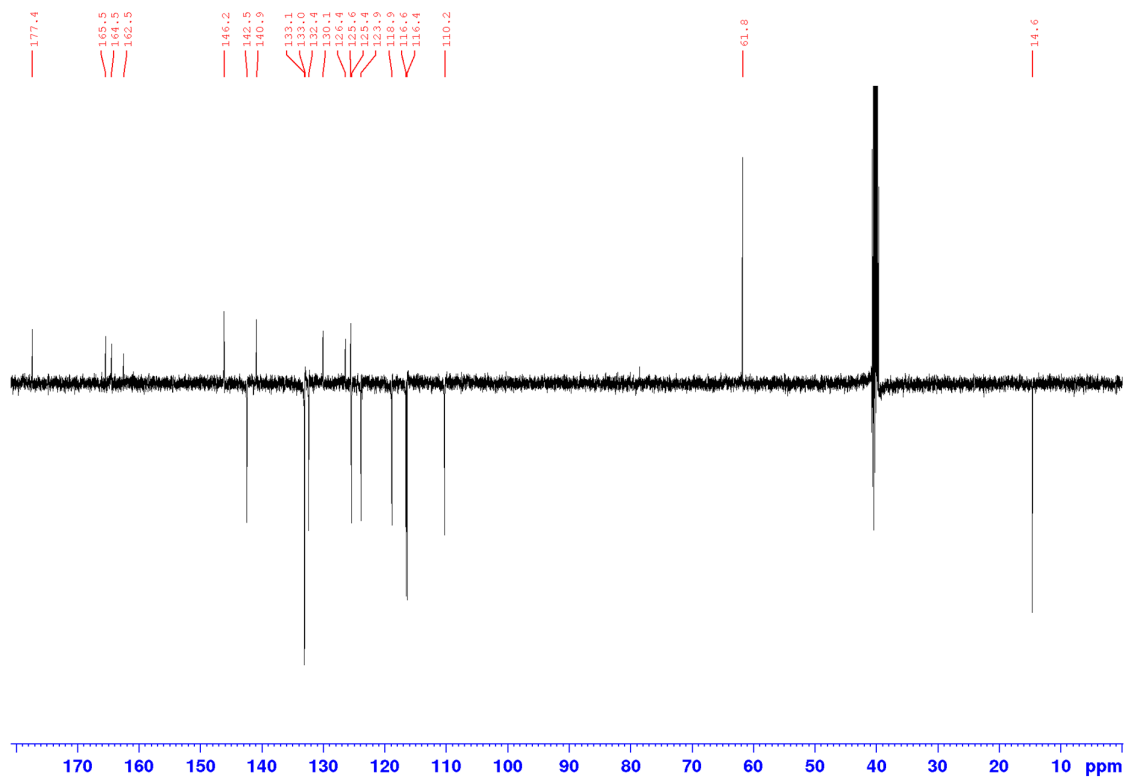

Figure S38. <sup>13</sup>C NMR spectrum of **21**

SZP-20220523-POS #2526-2547 RT: 13.08-13.18 AV: 22 NL: 2.63E9  
T: FTMS + p ESI Full ms [125.0000-1000.0000]

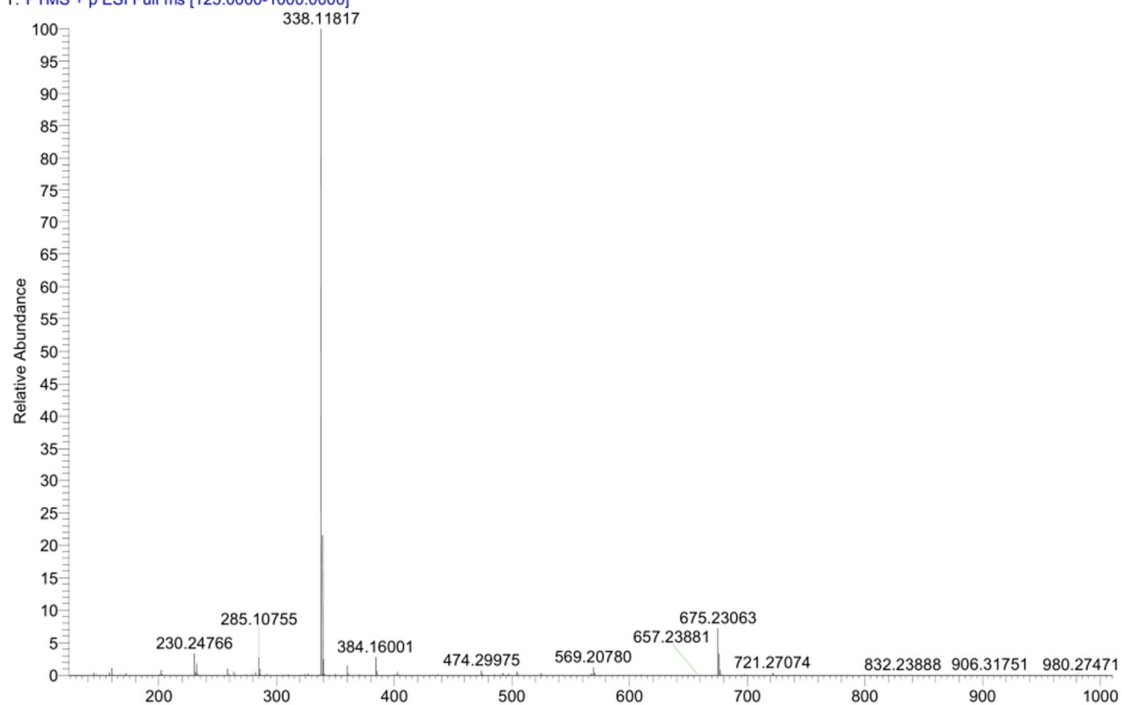

Figure S39. HRMS spectrum of **21**

(Z)-ethyl 2-(4-hydroxyquinolin-2-yl)-3-(*p*-tolyl)acrylate (**22**)

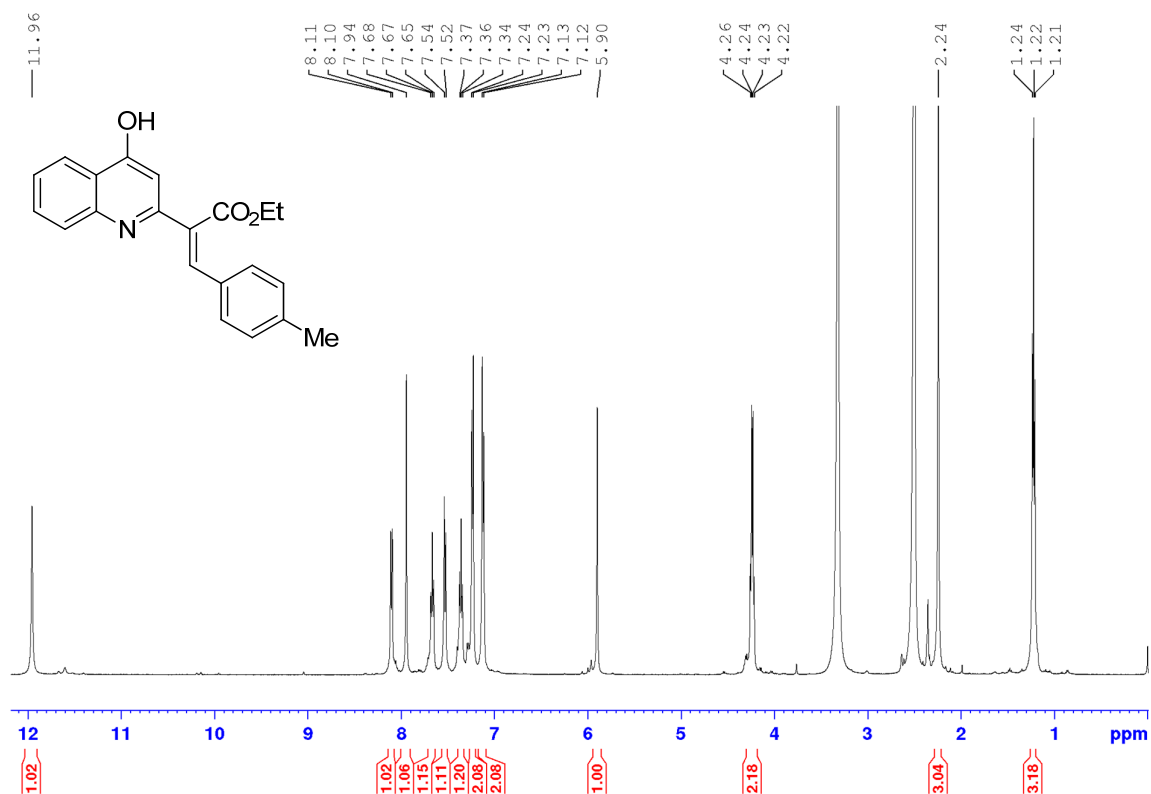

Figure S40. <sup>1</sup>H NMR spectrum of **22**

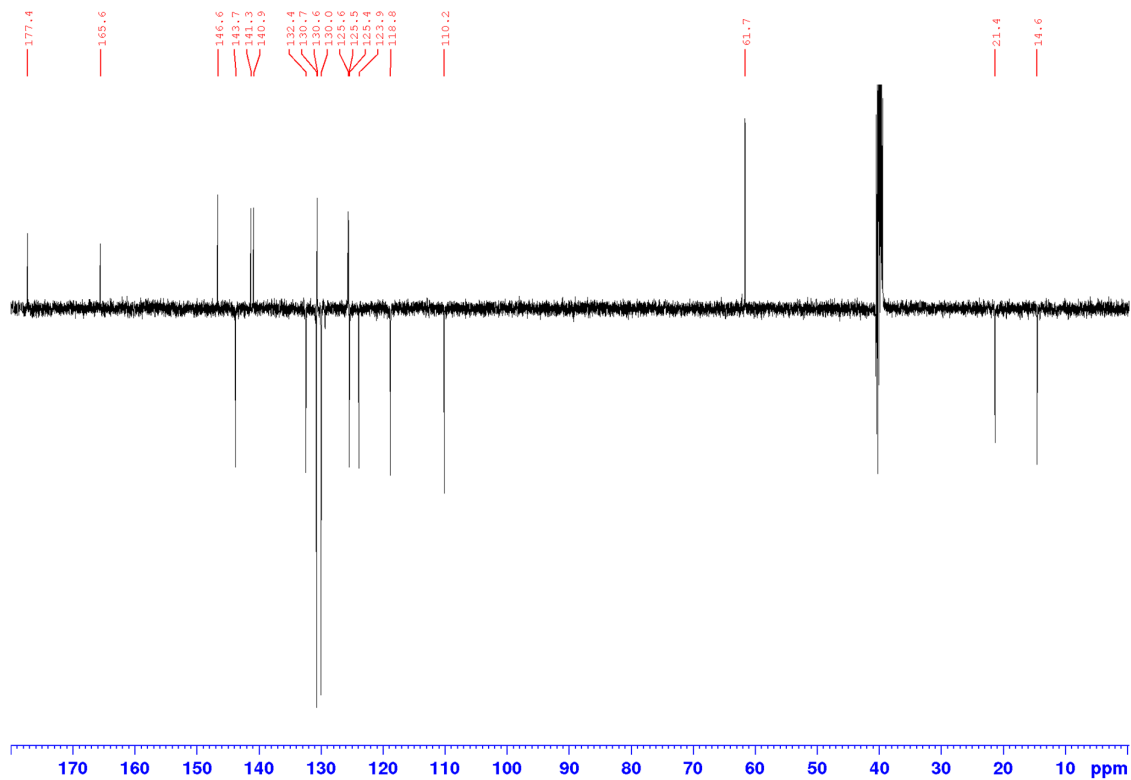

Figure S41. <sup>13</sup>C NMR spectrum of **22**

SZP-20220523-POS #2702-2738 RT: 13.99-14.17 AV: 37 NL: 1.55E9  
T: FTMS + p ESI Full ms [125.0000-1000.0000]

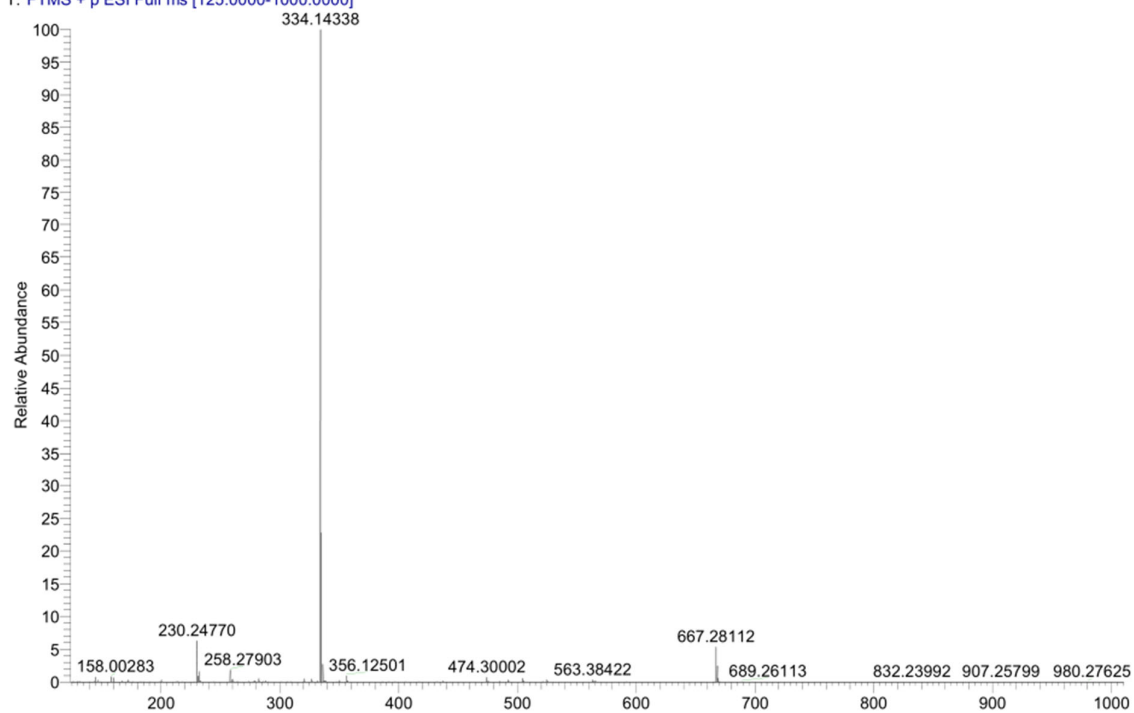

Figure S42. HRMS spectrum of **22**

(Z)-ethyl 2-(4-hydroxyquinolin-2-yl)-3-(4-methoxyphenyl)acrylate (**23**)

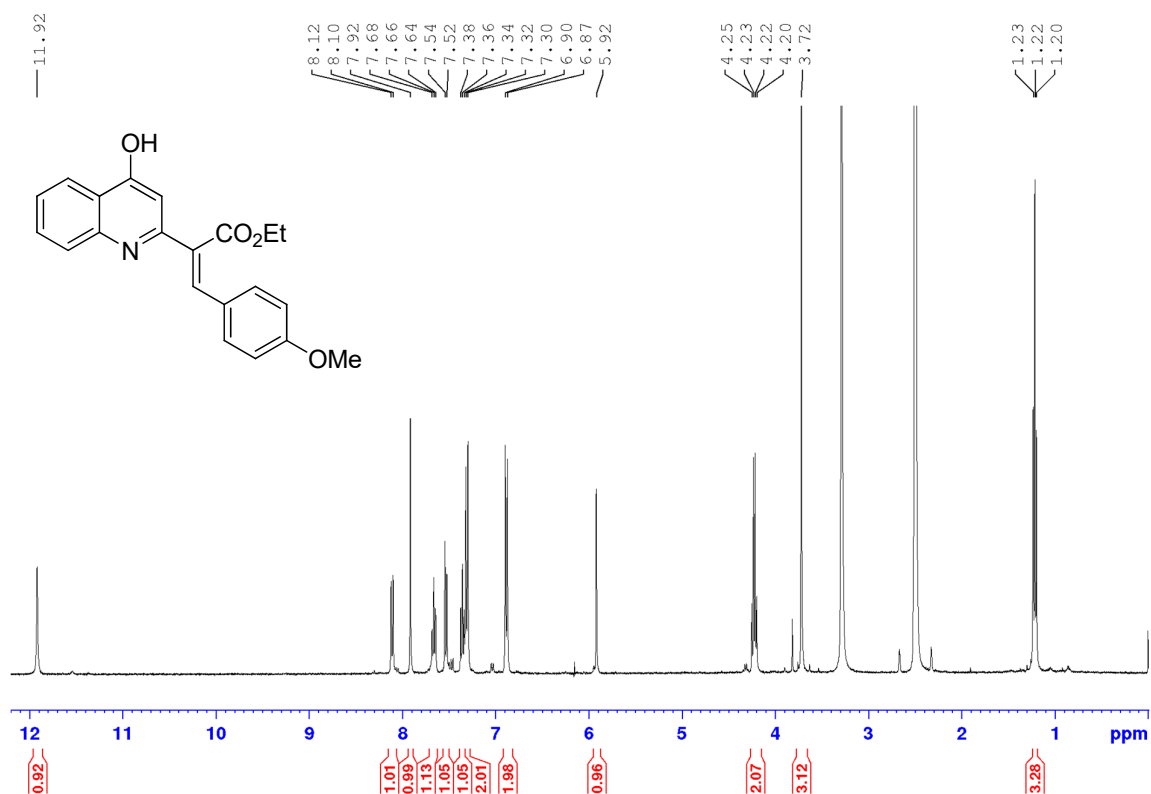

Figure S43. <sup>1</sup>H NMR spectrum of **23**

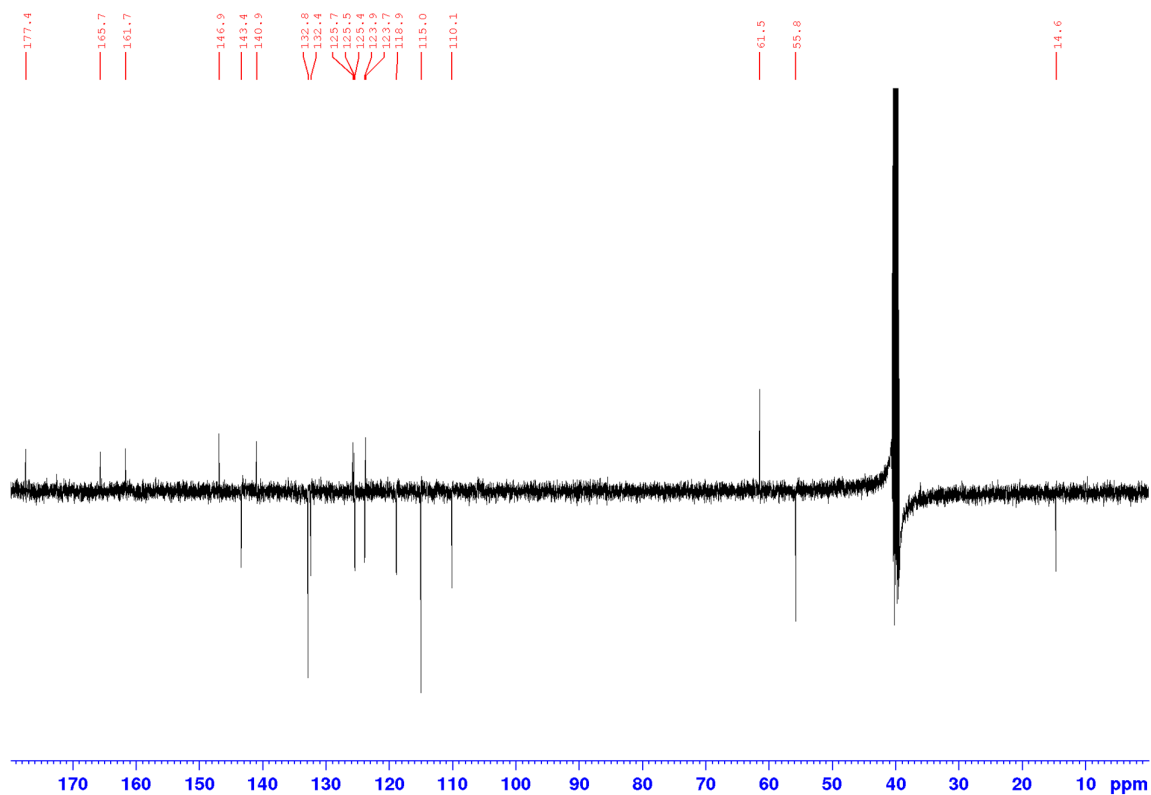

Figure S44. <sup>13</sup>C NMR spectrum of **23**

SZP-20220523-POS #2080-2120 RT: 10.76-10.96 AV: 41 NL: 1.94E9  
T: FTMS + p ESI Full ms [125.0000-1000.0000]

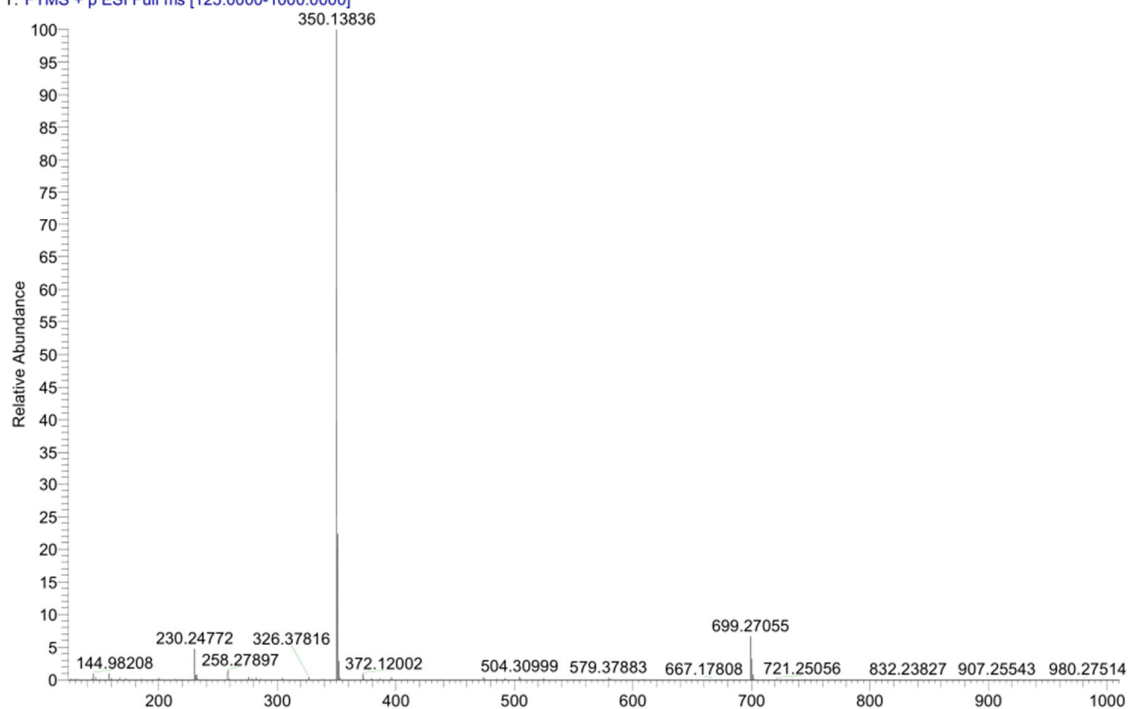

Figure S45. HRMS spectrum of **23**

(Z)-ethyl 3-(4-(dimethylamino)phenyl)-2-(4-hydroxyquinolin-2-yl)acrylate (**24**)

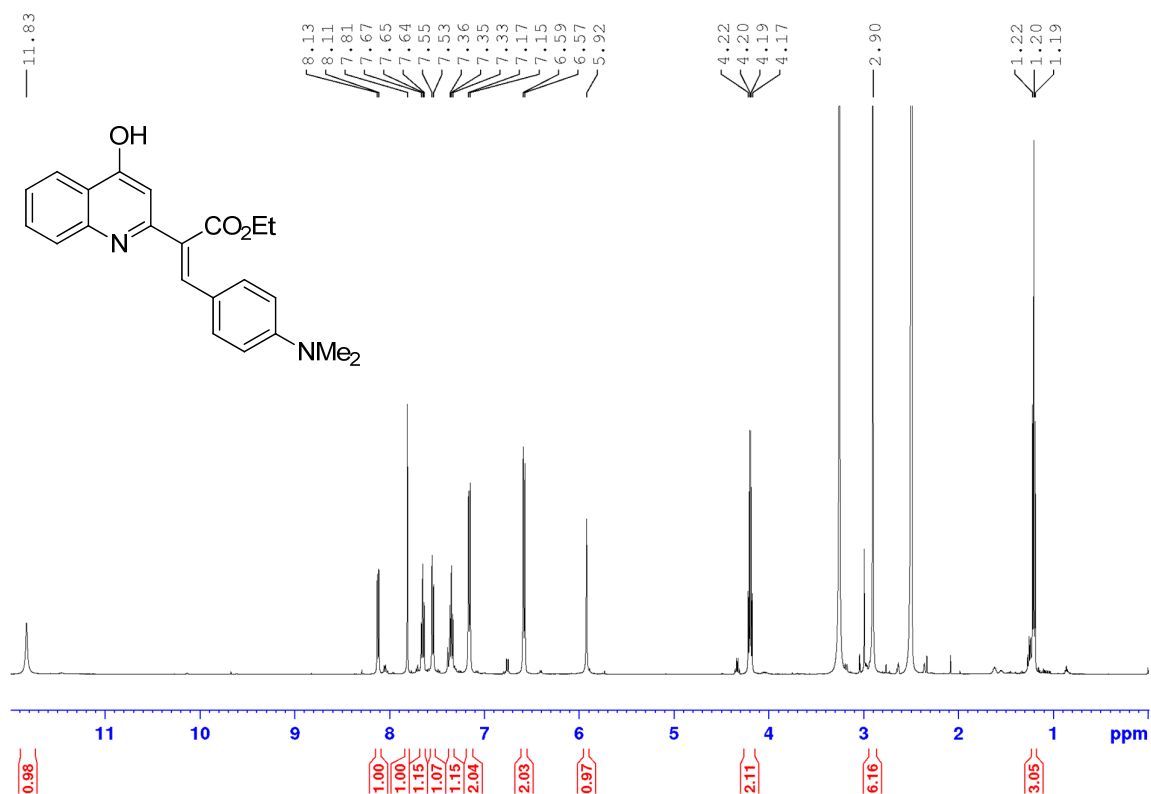

Figure S46. <sup>1</sup>H NMR spectrum of **24**

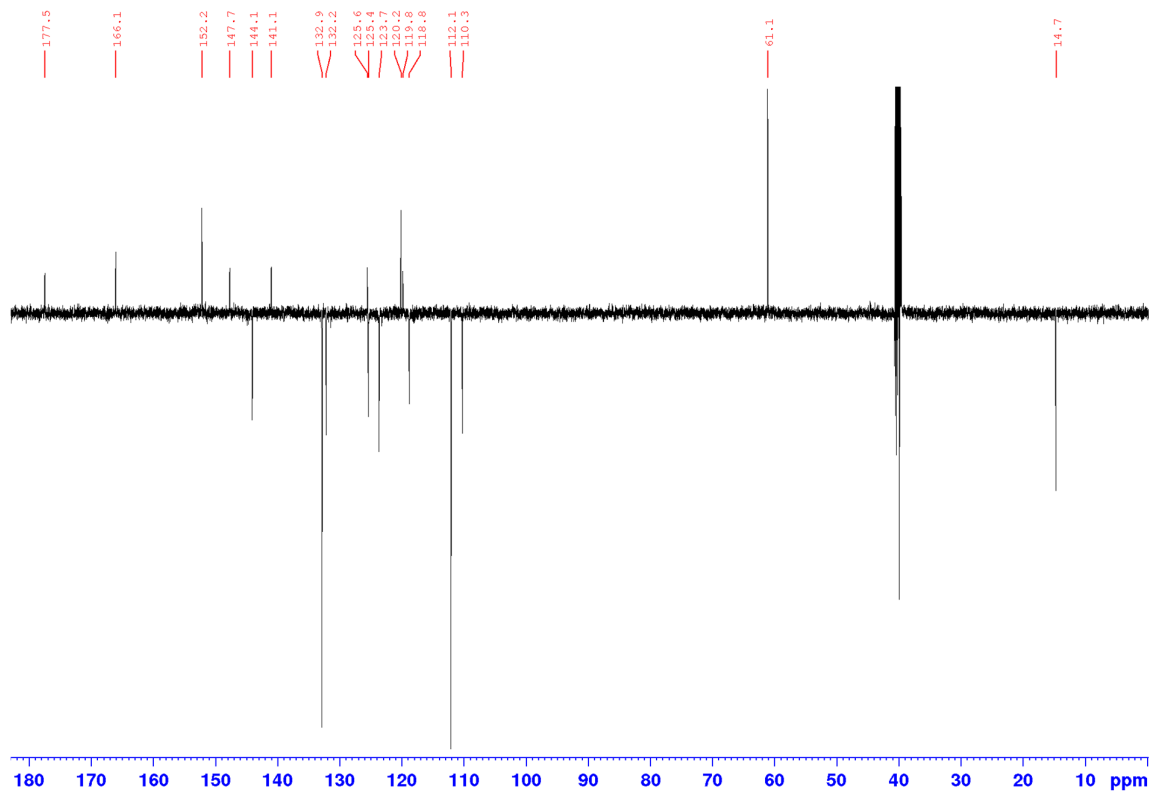

Figure S47. <sup>13</sup>C NMR spectrum of **24**



SZP-20220523-POS #3086-3122 RT: 16.00-16.18 AV: 37 NL: 1.71E9  
T: FTMS + p ESI Full ms [125.0000-1000.0000]

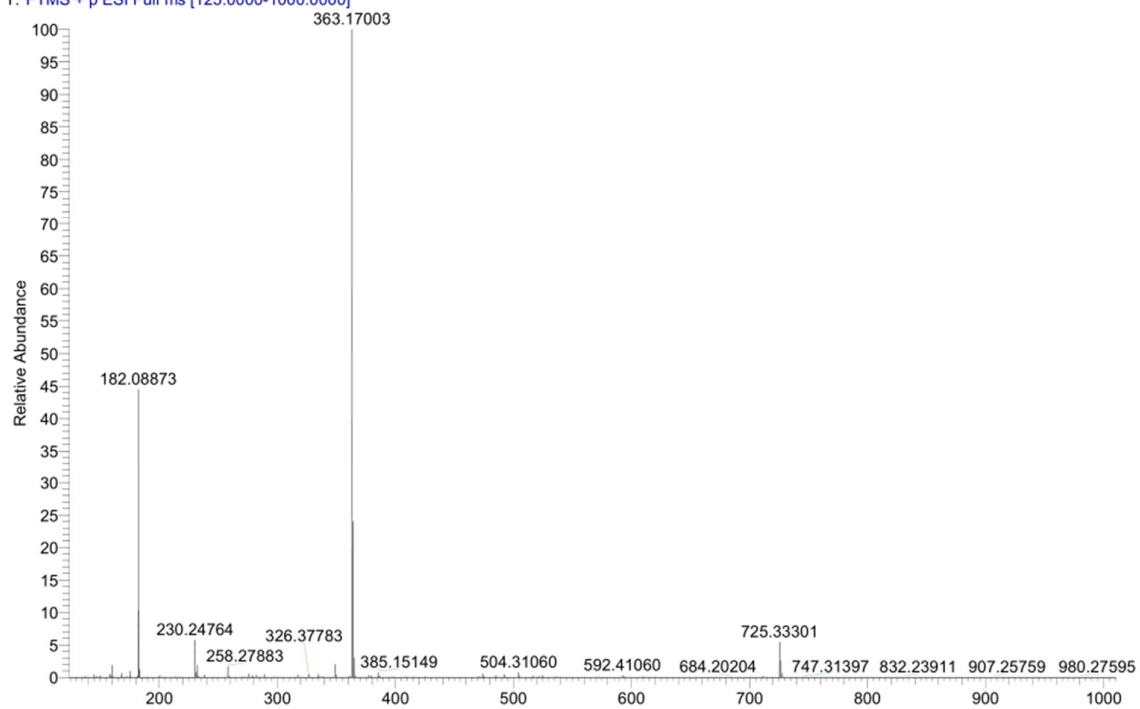

Figure S48. HRMS spectrum of **24**

(Z)-ethyl 2-(4-hydroxyquinolin-2-yl)-3-(naphthalen-1-yl)acrylate (**25**)

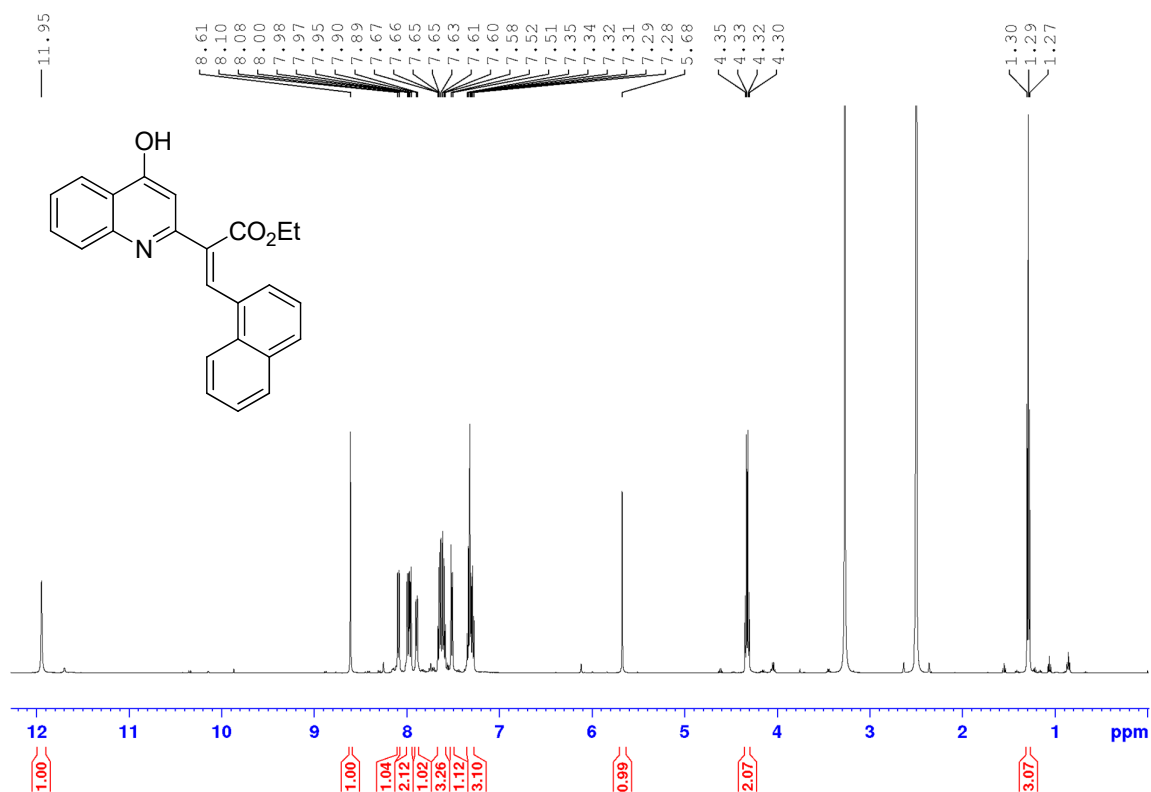

Figure S49. <sup>1</sup>H NMR spectrum of **25**

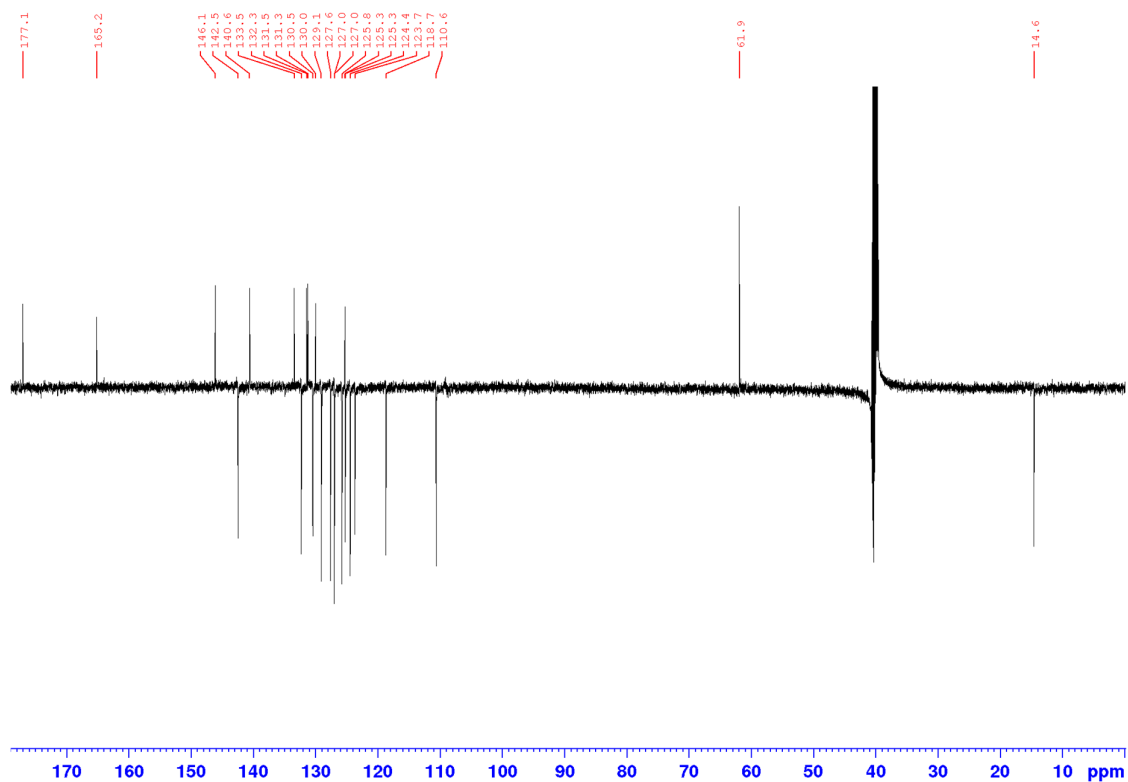

Figure S50. <sup>13</sup>C NMR spectrum of **25**

SZP-20220523-POS #3507-3536 RT: 18.18-18.33 AV: 30 NL: 1.79E9  
T: FTMS + p ESI Full ms [125.0000-1000.0000]

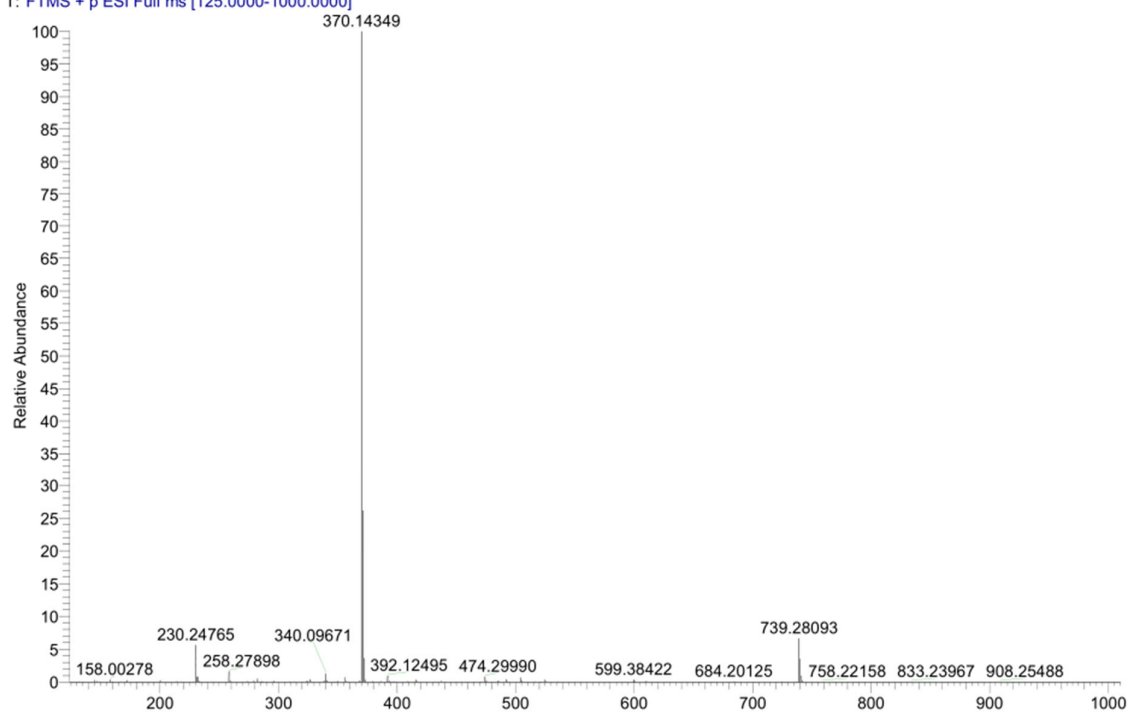

Figure S51. HRMS spectrum of 25

(Z)-ethyl 2-(4-hydroxyquinolin-2-yl)-3-(naphthalen-2-yl)acrylate (**26**)

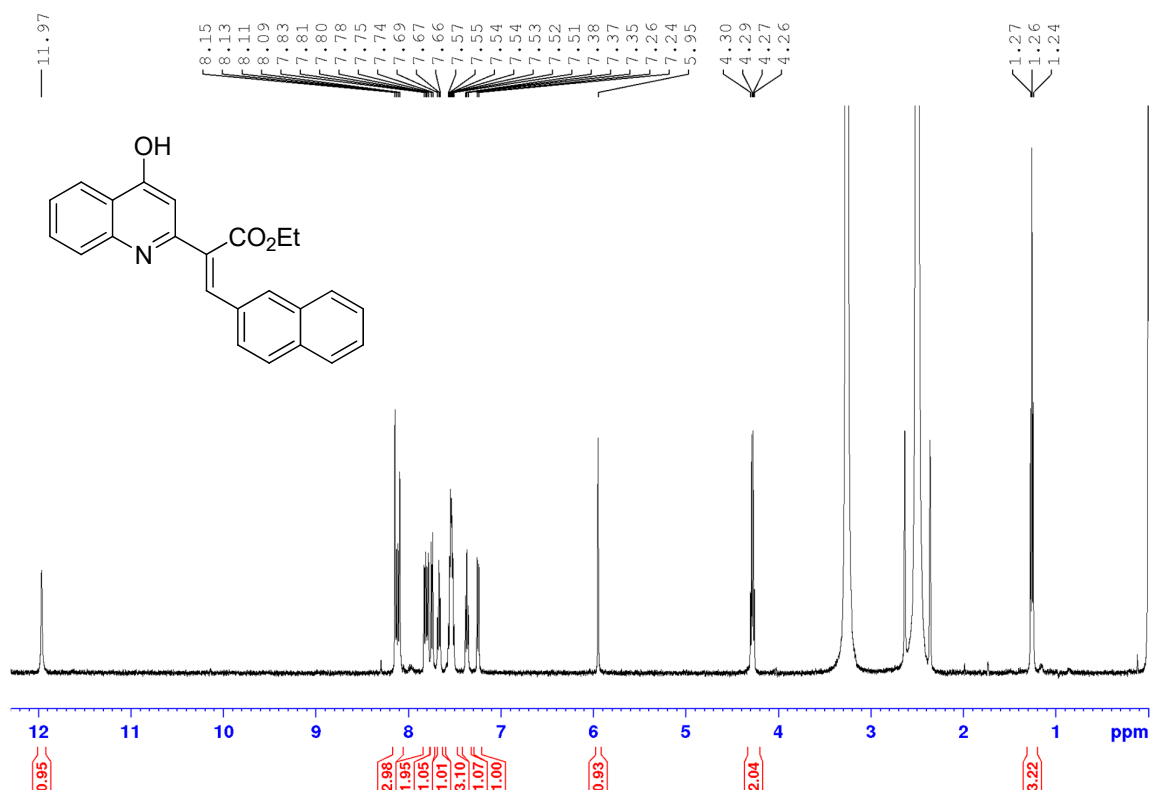

Figure S52. <sup>1</sup>H NMR spectrum of **26**

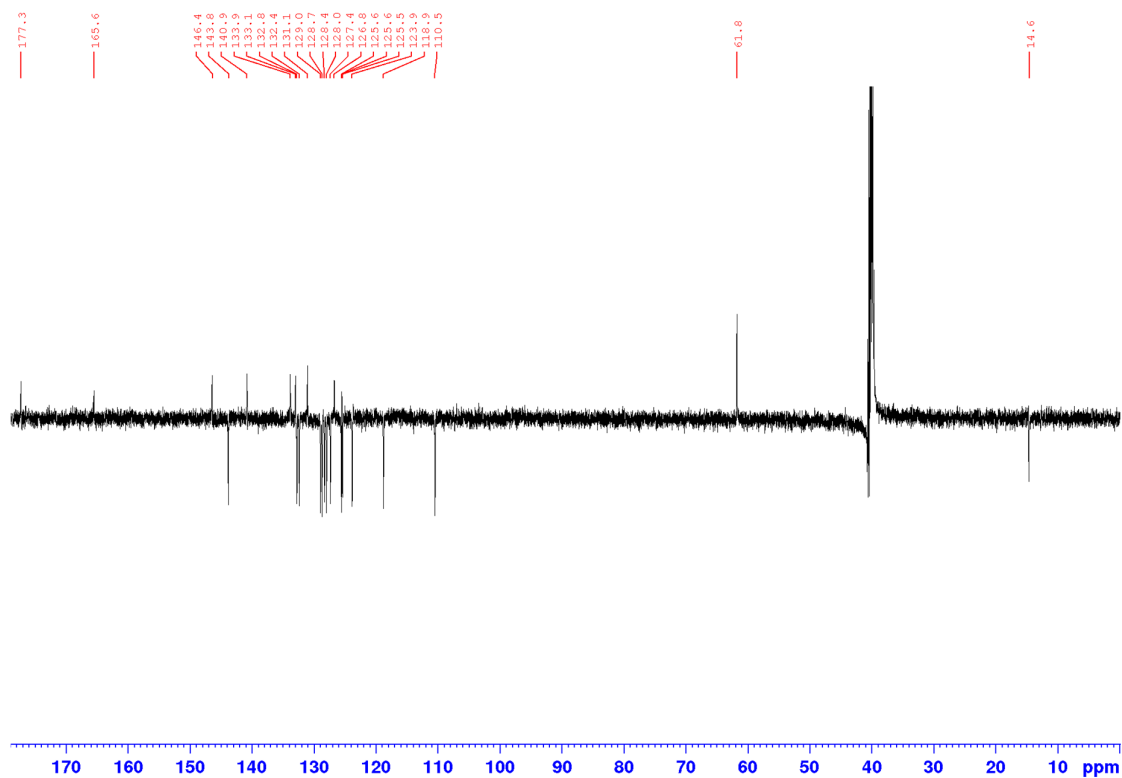

Figure S53. <sup>13</sup>C NMR spectrum of **26**

SZP-20220523-POS #3659-3692 RT: 18.97-19.14 AV: 34 NL: 1.13E9  
T: FTMS + p ESI Full ms [125.0000-1000.0000]

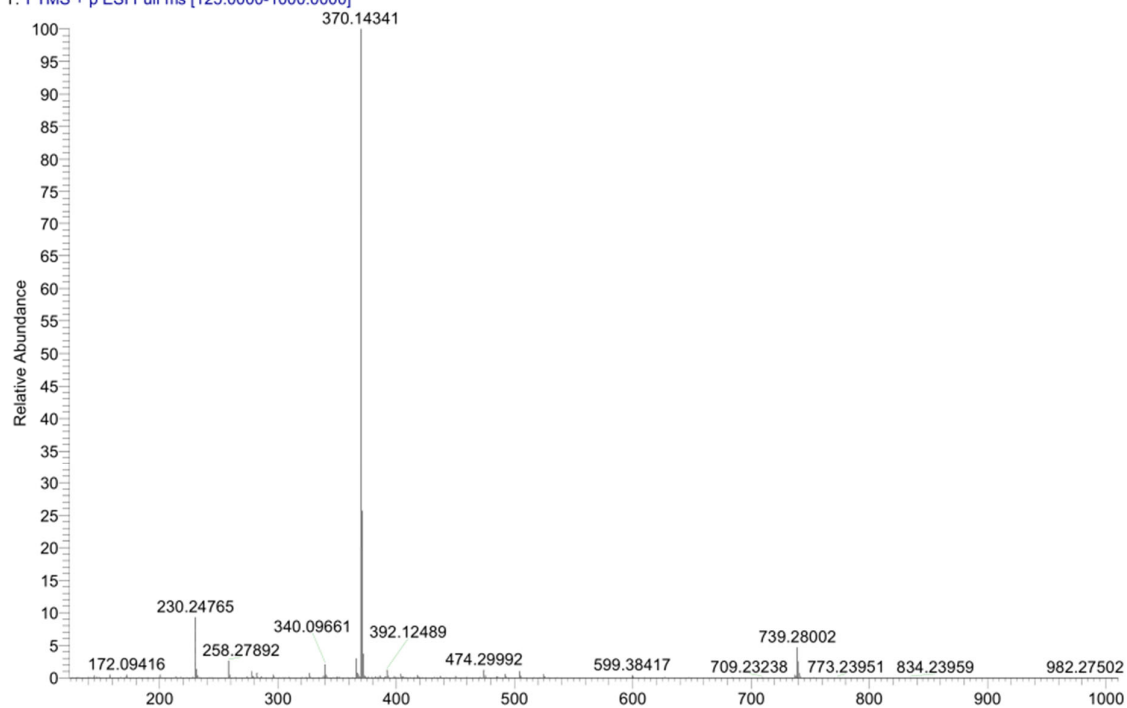

Figure S54. HRMS spectrum of 26

3-(4-Hydroxyquinolin-2-yl)-2H-chromen-2-one (28)

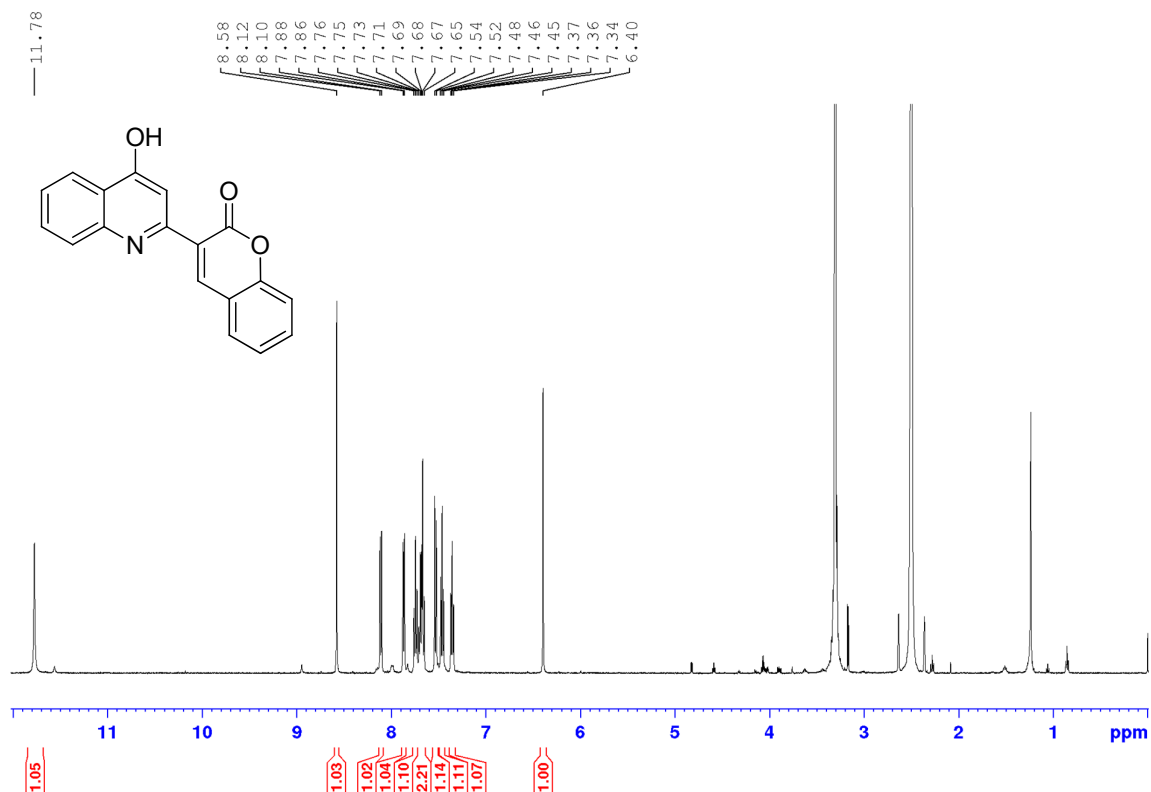

Figure S55. <sup>1</sup>H NMR spectrum of 28

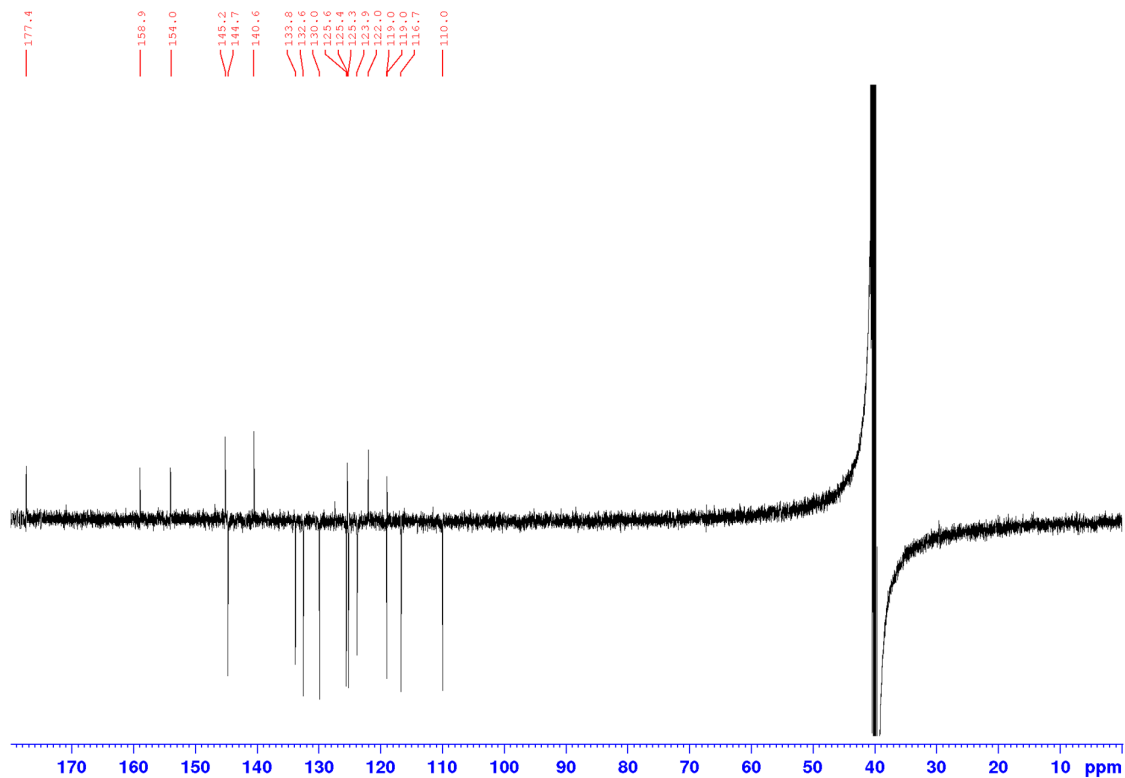

Figure S56. <sup>13</sup>C NMR spectrum of 28

SZP-20220523-POS #1365-1390 RT: 7.04-7.17 AV: 26 NL: 1.19E9  
T: FTMS + p ESI Full ms [125.0000-1000.0000]

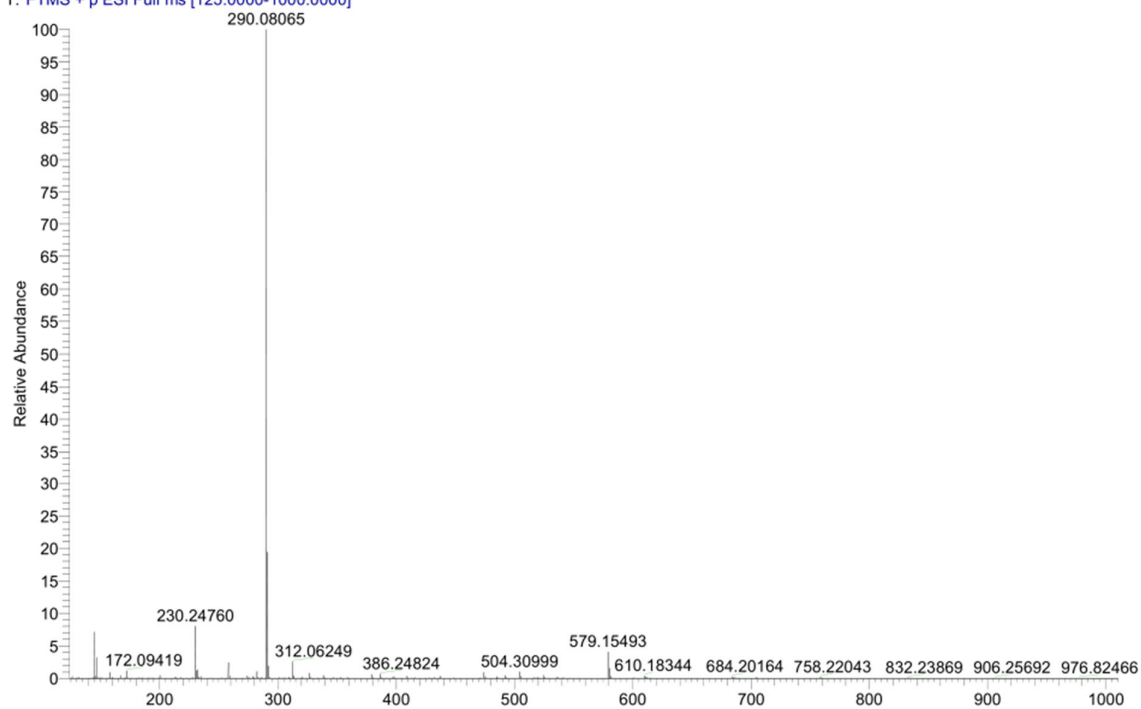

Figure S57. HRMS spectrum of 28

2-(4-Hydroxyquinolin-2-yl)-3H-benzo[*f*]chromen-3-one (29)

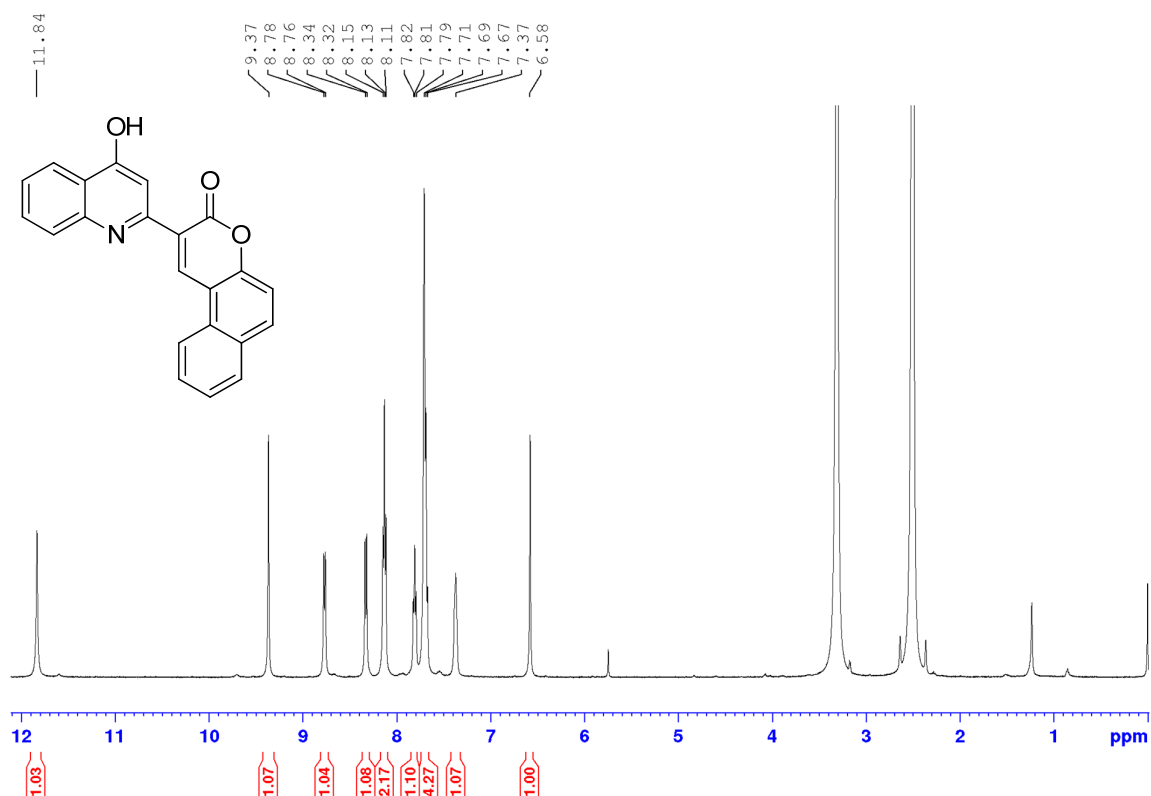

Figure S58. <sup>1</sup>H NMR spectrum of 29

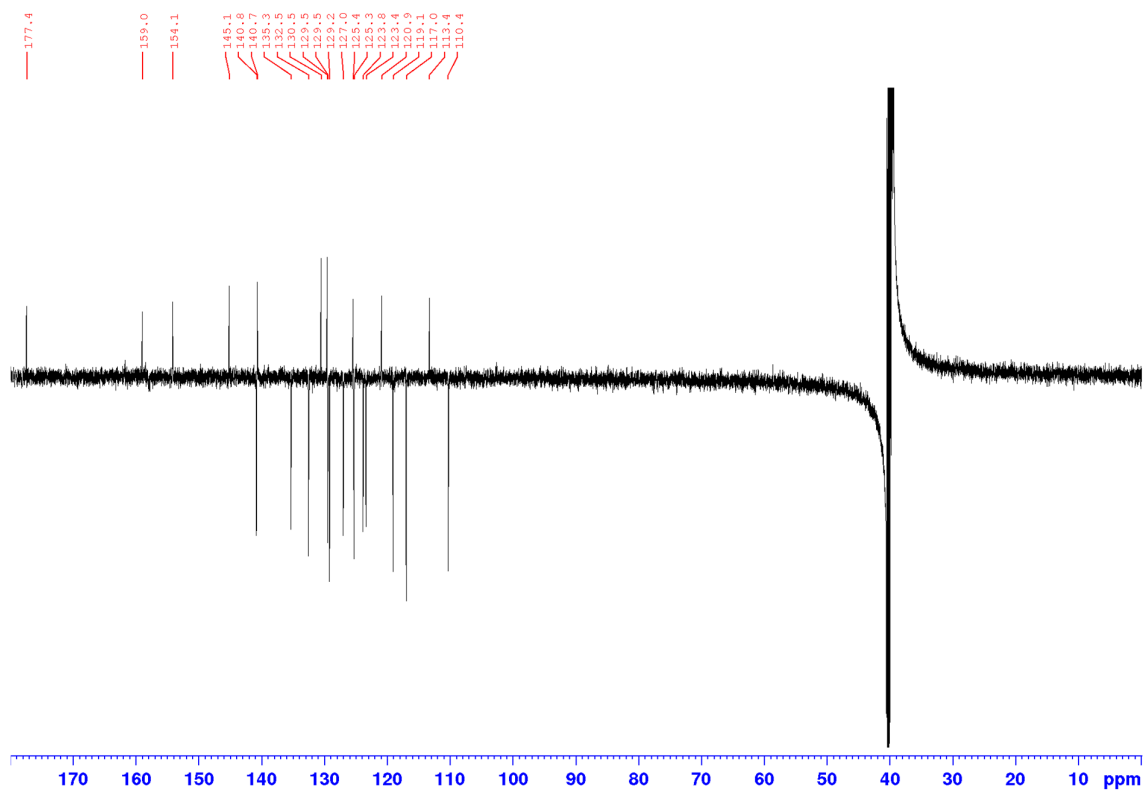

Figure S59. <sup>13</sup>C NMR spectrum of 29



SZP-20220523-POS #1581-1603 RT: 8.16-8.28 AV: 23 NL: 7.78E8  
T: FTMS + p ESI Full ms [125.0000-1000.0000]

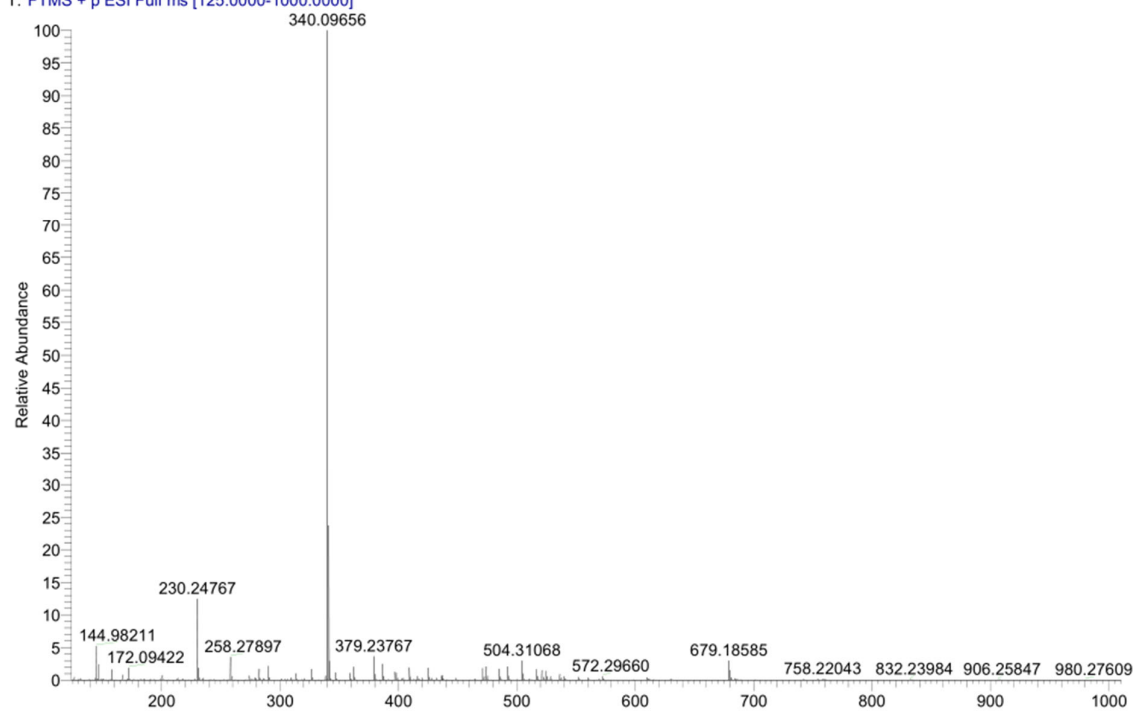

Figure S60. HRMS spectrum of **29**

3-(4-Hydroxyquinolin-2-yl)-2H-benzo[h]chromen-2-one (30)

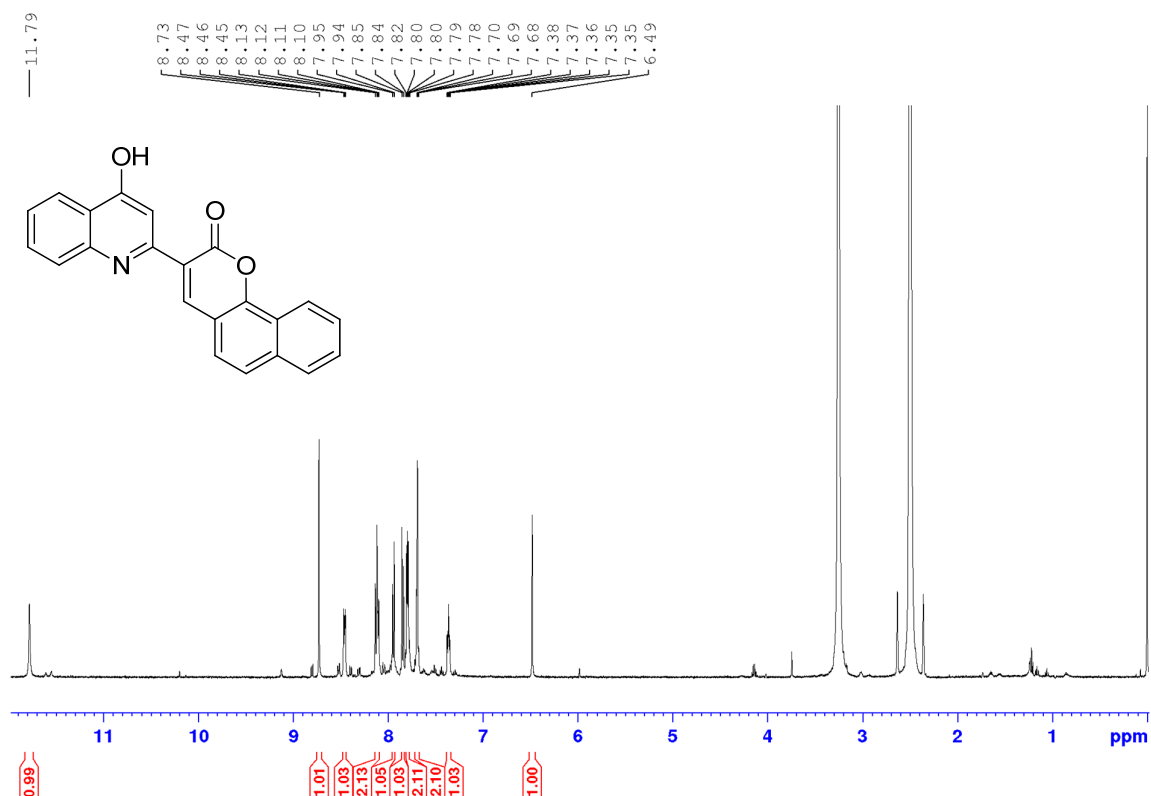

Figure S61. <sup>1</sup>H NMR spectrum of 30

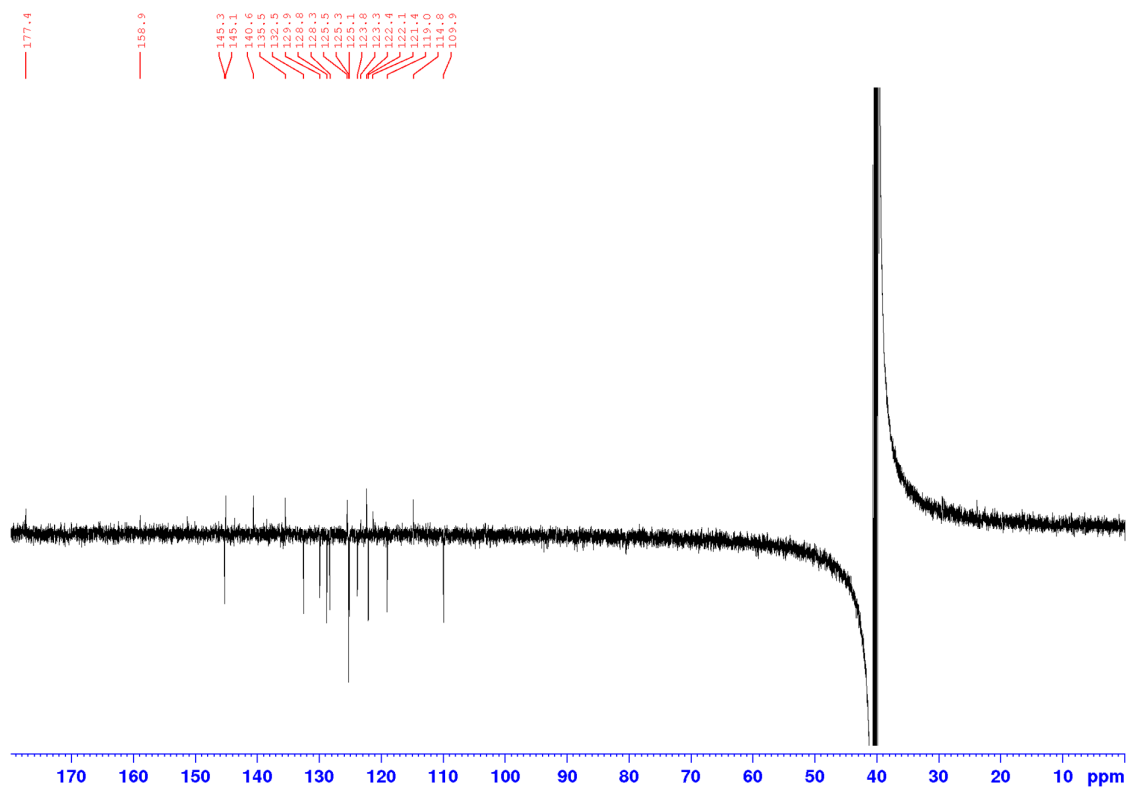

Figure S62. <sup>13</sup>C NMR spectrum of 30

SZP-20220523-POS #3284-3310 RT: 17.03-17.16 AV: 27 NL: 1.17E9  
T: FTMS + p ESI Full ms [125.0000-1000.0000]

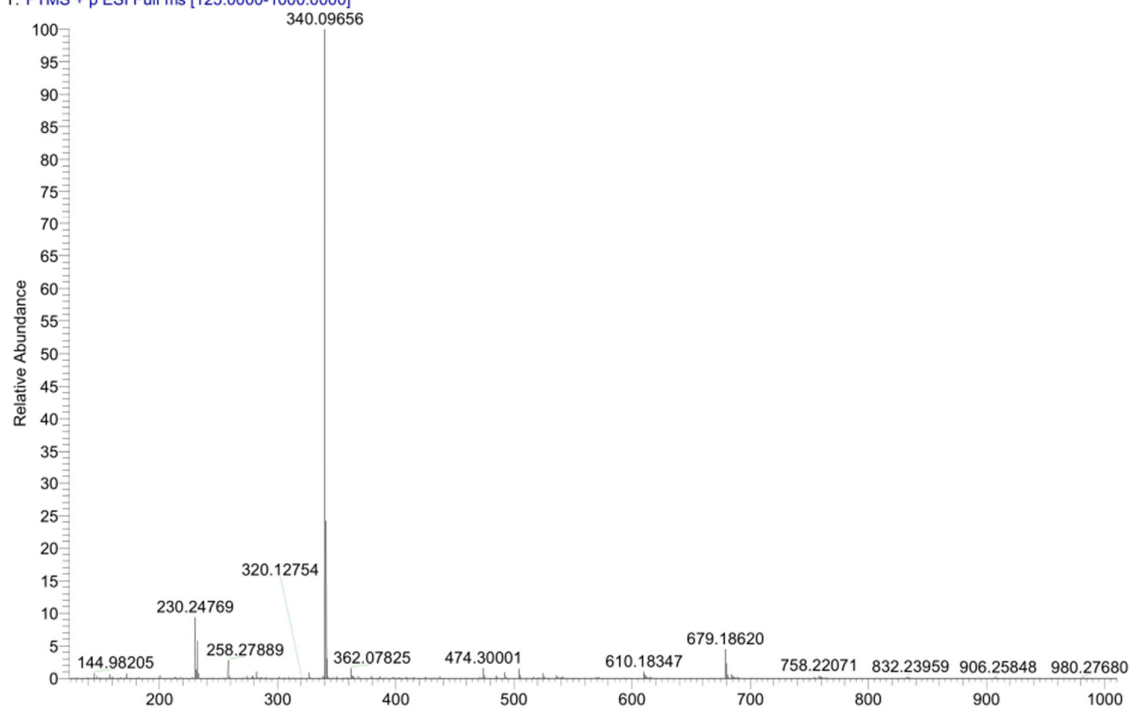

Figure S63. HRMS spectrum of 30

**2-(4-Hydroxyquinolin-2-yl)-3-phenylacrylic acid (14)**

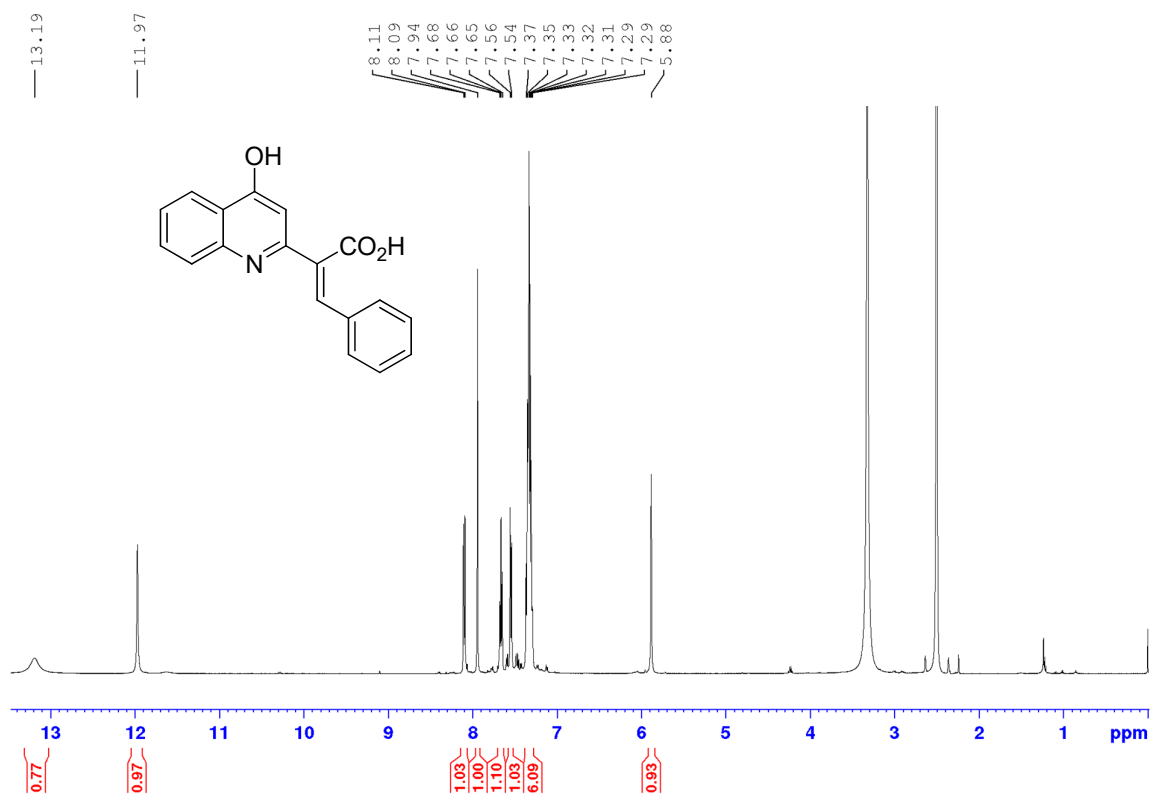

Figure S64. <sup>1</sup>H NMR spectrum of **14**

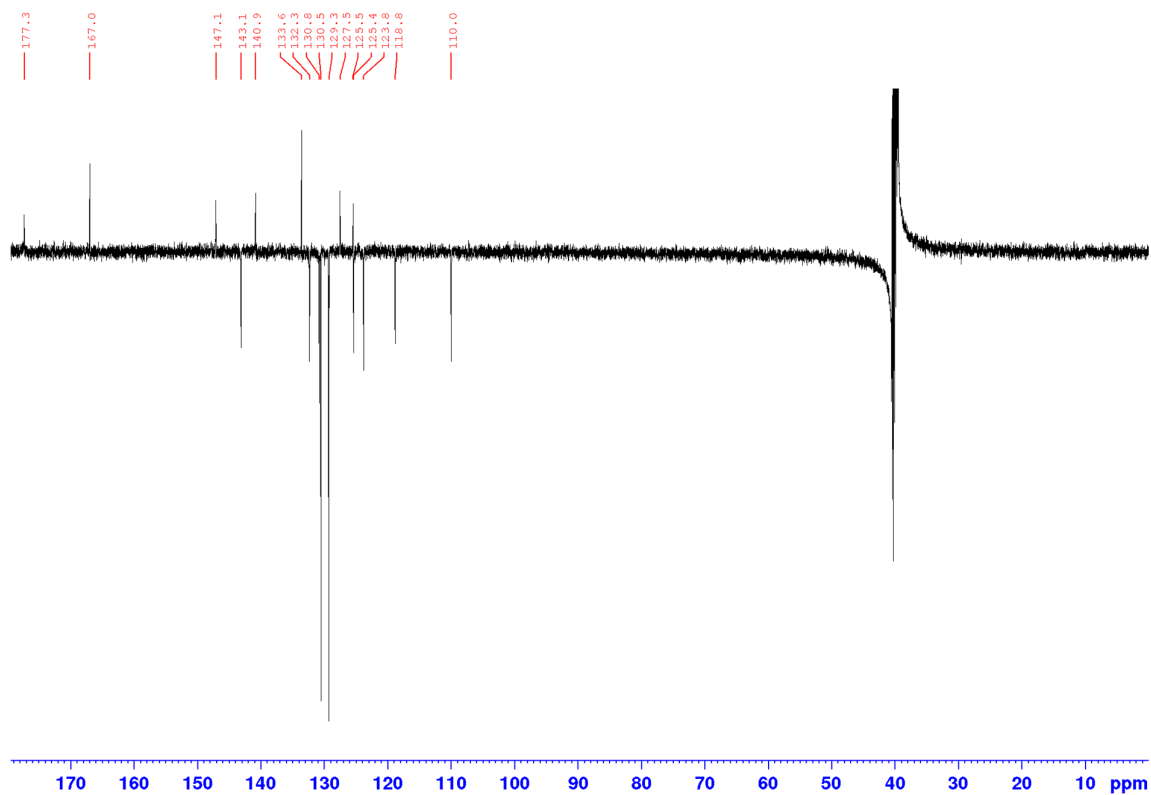

Figure S65. <sup>13</sup>C NMR spectrum of **14**

SZP-20220523-POS #4210-4235 RT: 21.85-21.97 AV: 26 NL: 1.46E9  
T: FTMS + p ESI Full ms [125.0000-1000.0000]

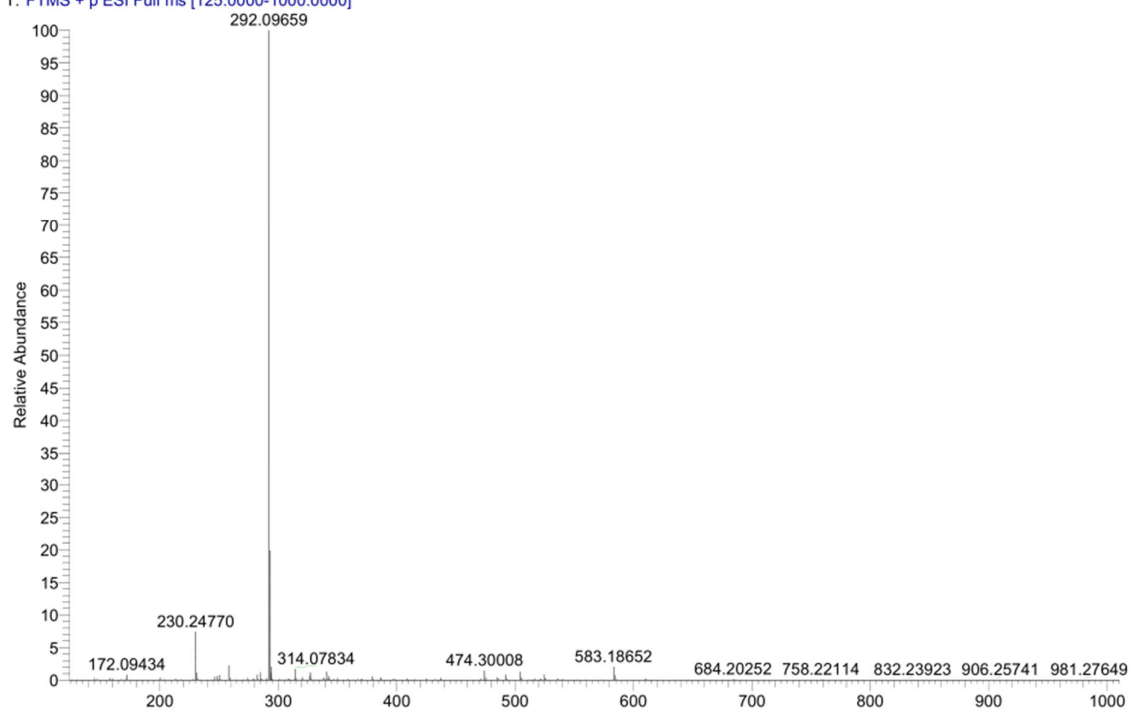

Figure S66. HRMS spectrum of **14**
